# Supplementary material for: A global experiment on motivating social distancing during the COVID-19 pandemic
Source: PubMed Central journal article supplement (PMC9295806; doi:10.1073/pnas.2111091119), 2022-05-27
Supplement: pnas.2111091119.sapp.pdf [file pnas.2111091119.sapp.pdf]

## Supplemental Information Appendix

This document contains a) the results for baseline adherence and manipulation check analyses, b) more information about our design and procedure, translation process, and data exclusions and analytical strategy, c) a table of sample sizes for each country, d) analyses with two exploratory covariates, and e) a list of all the co-authors that are part of the Psychological Science Accelerator Rapid-Response COVID-19 Project along with all authors' contributions.

### Results

#### Quality Checks

First, we examined whether the three conditions differed on a baseline measure of how much participants were already adhering to social distancing recommendations. Because differences across conditions were negligible ( $r_p = .014$  and  $.008$ , see *Table S2* below) and lower than our preregistered threshold, baseline adherence was not included as a covariate in confirmatory models. Second, as this study was bundled with one other study in the Psychological Science Accelerator Covid-19 Rapid (PSACR) project, we examined potential carryover effects based on the order of presentation (our study was presented first or was the only study participants took part in for  $n = 17,729$ , coded 0; or, it was presented after the bundled PSACR001 study,  $n = 7,989$ , coded 1). We tested the main effect of study order and the interaction with condition to examine whether the study order effect differentially impacted the effect of condition on the manipulation check (i.e., perceptions of social distancing recommendations as controlling). Effects surpassed our preregistered threshold,  $r_p$  ranging from  $.035$ – $.043$  (see *Table S2*), suggesting an effect of order. We tested models excluding participants who were exposed to the other PSACR study — PSACR001 — first and found the same pattern of results. We present these subsample results in *Table S3* below and present the results from the full sample in the manuscript main text. This switch to

present full sample models in the main text represents a deviation from the preregistration; we did this to retain participants from as many countries as possible since we observed the same pattern of results.

### **Manipulation Check**

Following this, we examined condition effects on the manipulation check, how controlling participants perceived the social distancing recommendations to be. The controlling message was perceived as more pressuring than both the autonomy-supportive message,  $r_p = .163$ , 95% CI [.176, .152], and general social distancing recommendations assessed in the no-message condition,  $r_p = .096$ , 95% CI [.108, .083].

## **Methods**

### **Design and Procedure**

This project deviated from the described methods of the PSACR project in that additional data collection labs were recruited through a network of self-determination theory (SDT) researchers. SDT labs were given a Qualtrics link for their lab's survey<sup>1</sup> whereas Psychological Science Accelerator (PSA) labs' data collection was centralized across labs with one survey using the *formr* (1) framework. Participants recruited by SDT labs only completed this study, and participants recruited by PSA labs completed this and a second, separate, PSACR experiment (coded as PSACR001)<sup>2</sup>. For those who participated in both studies, order was recorded to examine for possible carry-over effects.

### **Translations**

---

<sup>1</sup> Two SDT labs (in Iran and Thailand) were not able to use Qualtrics for data collection because of restrictions and used Google Forms to collect data. Because of this difference in survey format, there were irregularities for the six-month behavioral intentions items. For analyses with this six-month behavioral intentions variable, the Thai lab was excluded ( $n = 240$ ) because they measured items on a 1-7 scale (versus 1-24 weeks), and 10 individuals in the Iranian lab were excluded because they indicated a number higher than 24 [weeks] in the open-ended textbox.

<sup>2</sup> There was a period of approximately one month at the start of data collection (April, 2020) when this study (coded as PSACR003) was the only PSACR study collecting data and thus all participants recruited through PSA labs in April took part only in the present study.

All study materials were translated into the modal local language of participants recruited by each lab. The PSA identified translators for every language represented in the pool of collaborators, except for Thai, which was translated by a SDT lab. In all countries where participants' modal native language was not English, study materials were forward- and backward-translated by two or more translators (2). Once the translators agreed on a translation, the translated materials were sent to labs for any further cultural adjustment to their local context (e.g., differences between European and Brazilian Portuguese). In total, the survey was translated into 42 languages and regional dialects.

## **Measures**

### ***Baseline Adherence***

Before random assignment to condition, participants answered questions about how much they were “currently following the recommendation to stay at home as much as possible” and how much they were following recommendations to avoid three specific situations: “gatherings with friends”, “crowded areas”, and “non-essential shopping trips”. Participants rated their responses on a 7-point scale (1 = *not at all*, 7 = *completely*). The scale showed acceptable reliability for all items combined ( $\omega = .87$ ). Higher scores indicate greater adherence to social distancing guidance at baseline.

### ***Perceived Control (Manipulation Check)***

At the end of the study, participants responded to three items that assessed how autonomy-supportive versus controlling participants perceived the social distancing recommendations to be. These items were adapted from the Health Care Climate Questionnaire (3, 4). Participants in the autonomy-supportive and controlling message conditions responded to the stem “I feel that social distancing recommendations [in this article]” paired with the items: “...provided people some choices and options”, “...try to pressure people”, and “...aren't very sensitive to people's needs”. Participants in the no-

message condition responded to the same stem with the words “in this article” excluded. Participants rated their responses on a 7-point scale (1 = *strongly disagree*, 7 = *strongly agree*). These three items showed less than acceptable reliability ( $\omega = .62$ ), so, following the preregistered procedure, we retained the two items (the second and third items above) that showed corrected item-total correlations above .30. Higher scores indicated perceiving recommendations as more controlling ( $\omega = .67$ ).

## **Analytic Strategy**

### ***Data Exclusions***

Several basic cleaning steps were applied to the raw data (see <https://osf.io/uzqdr/>): duplicate entries were removed, test sessions that occurred before the survey launched in each language were removed, the data were deidentified, and blank observations produced by the survey software were removed.

The preregistration describes a procedure for excluding data on the basis of completion time only. We deviated from the preregistration by adding three additional exclusion criteria that rendered the data unfit for our analyses. Our procedure was approved by ethics boards for participants over 18. We excluded data from participants who were less than 18 years old ( $n = 30$ ). We also excluded data from participants who did not fill out at least 75% of the outcome measures ([motivation, feelings of defiance, behavioral intentions, and the manipulation check];  $n = 1,442$ ). Of participants who did not fill out at least 75% of the outcome measures, most filled out no outcome measures ( $n = 1,409$ ). Finally, we excluded data from participants whose country could not be identified ( $n = 692$ ). After these exclusions, there were no participants who were excluded for fast responding (less than two standard deviations of the mean time of completion within each condition). See *Figure 1* in the main text delineating the final sample.

### ***Modelling Approach***

Before fitting models, we ensured there was sufficient variance at both individual and country-levels. Intraclass correlation coefficients ranged from .03 -.15, indicating that while sufficient for mixed-effects models, at most only 15% of variance was explained by between-country differences. Most of the variance was between individuals within country.

When fitting maximal models, or models with random slopes, we excluded countries with sample sizes below 210 to help with model convergence. This yielded a sample of 23,557 individuals in 35 countries for analyses with random slopes. Comparisons of the Akaike information criterion — an estimator of prediction error that evaluates how well a model fits the data [3] — indicated that the maximal models fit the data better than the intercept-only models. Nonetheless, we did not observe large variance around the slopes of condition (see *Table 3* in the main text). Because of little variance around the slopes in some models, some models failed to converge. This indicates that effects of our manipulation did not vary widely across these 35 countries, even though countries might differ in their averages on the measured variables.

To test Hypothesis 1, whether those in the no-message and autonomy-supportive message conditions differed on outcomes as compared to those exposed to a controlling message, we created two dummy variables. The autonomy-supportive message and no-message conditions (entered simultaneously into models) were both coded 1, and the controlling message condition was the reference group, coded 0. For Hypothesis 2, we examined whether self-reported autonomous and controlled motivation, also entered simultaneously, predicted outcomes (defiance and short and long-term behavioural intentions) using mixed-effects models.

## References

1. Arslan, R. C., M. P. Walther, C. S. Tata, formr: A study framework allowing for automated feedback generation and complex longitudinal experience-sampling studies using R. *Behavior Research Methods* **52**, 376–387 (2020).
2. Brislin, R. W. (1970). *Back-translation for cross-cultural research* (1971-06132-001; Issues 2-B) [ProQuest Information & Learning]. APA PsycInfo.  
<https://ezproxy.gl.iit.edu/login?url=http://search.ebscohost.com/login.aspx?direct=true&db=psyh&AN=1971-06132-001&site=ehost-live>
3. Kasser, V. G., R. M. Ryan, The Relation of Psychological Needs for Autonomy and Relatedness to Vitality, Well-Being, and Mortality in a Nursing Home<sup>1</sup>. *J Appl Social Pyschol* **29**, 935–954 (1999).
4. Williams, G. C., Cox, E. M., Kouides, R., Deci, E. L. Presenting the Facts About Smoking to Adolescents: Effects of an Autonomy-Supportive Style. *Arch Pediatr Adolesc Med* **153**, 959 (1999).
5. T. Hale, *et al.*, A global panel database of pandemic policies (Oxford COVID-19 government response tracker). *Nat. Hum. Behav.* **5**, 529–538 (2021).

**Table S1**

*List of countries/regions (alphabetized by country/region) and their respective stringency measures implementation date and sample sizes collected through the PSA and SDT networks.*

| <b>Country/region name</b> | <b>Stringency date</b> | <b>PSA<br/>(n = 18,710)</b> | <b>SDT<br/>(n = 7,008)</b> | <b>Total<br/>(n = 25,718)</b> |
|----------------------------|------------------------|-----------------------------|----------------------------|-------------------------------|
| Albania                    | 14/03/2020             | 2                           |                            | 2                             |
| Algeria                    | 22/03/2020             | 2                           |                            | 2                             |
| Argentina                  | 22/03/2020             | 124                         |                            | 124                           |
| Armenia                    | N/A                    | 17                          |                            | 17                            |
| Australia                  | 23/03/2020             | 539                         | 1128                       | 1667                          |
| Austria                    | 15/03/2020             | 527                         |                            | 527                           |
| Azerbaijan                 | 22/03/2020             | 1                           |                            | 1                             |
| Bahrain                    | 27/03/2020             | 1                           |                            | 1                             |
| Bangladesh                 | 25/03/2020             | 21                          |                            | 21                            |
| Belarus                    | 07/04/2020             | 4                           |                            | 4                             |
| Belgium                    | 19/03/2020             | 104                         | 1010                       | 1114                          |
| Bosnia and Herzegovina     | 19/03/2020             | 22                          |                            | 22                            |
| Brazil                     | 20/03/2020             | 105                         |                            | 105                           |
| British Virgin Islands     | N/A                    | 1                           |                            | 1                             |
| Brunei                     | 23/03/2020             | 1                           |                            | 1                             |
| Bulgaria                   | 20/03/2020             | 83                          |                            | 83                            |
| Canada                     | 22/03/2020             | 258                         | 253                        | 511                           |
| Cape Verde                 | 31/03/2020             | 1                           |                            | 1                             |
| Chile                      | 24/03/2020             | 278                         | 401                        | 679                           |
| China                      | 31/01/2020             | 468                         |                            | 468                           |
| Colombia                   | 24/03/2020             | 109                         |                            | 109                           |
| Costa Rica                 | 20/03/2020             | 191                         |                            | 191                           |
| Croatia                    | 22/03/2020             | 945                         |                            | 945                           |
| Cyprus                     | 23/03/2020             | 5                           |                            | 5                             |
| Czechia                    | 22/03/2020             | 213                         |                            | 213                           |
| Denmark                    | 13/03/2020             | 3                           |                            | 3                             |
| Ecuador                    | 16/03/2020             | 18                          |                            | 18                            |
| Egypt                      | 24/03/2020             | 612                         |                            | 612                           |
| Finland                    | 17/03/2020             | 147                         | 236                        | 383                           |
| France                     | 16/03/2020             | 653                         |                            | 653                           |
| Germany                    | 21/03/2020             | 294                         | 235                        | 529                           |
| Greece                     | 22/03/2020             | 70                          | 55                         | 125                           |
| Guadeloupe                 | N/A                    | 1                           |                            | 1                             |
| Guam                       | N/A                    | 1                           |                            | 1                             |
| Hong Kong                  | 28/01/2020             | 28                          |                            | 28                            |
| Hungary                    | 15/03/2020             | 97                          |                            | 97                            |

|              |            |      |     |      |
|--------------|------------|------|-----|------|
| Iceland      | 19/03/2020 | 1    |     | 1    |
| India        | 21/03/2020 | 35   |     | 35   |
| Iran         | 04/03/2020 | 67   | 184 | 251  |
| Ireland      | 27/03/2020 | 55   |     | 55   |
| Israel       | 16/03/2020 | 118  |     | 118  |
| Italy        | 04/03/2020 | 124  | 552 | 676  |
| Japan        | 01/03/2020 | 1064 |     | 1064 |
| Jordan       | 17/03/2020 |      | 450 | 450  |
| Kazakhstan   | 28/03/2020 | 3    |     | 3    |
| Kenya        | 23/03/2020 | 671  |     | 671  |
| Kosovo       | 23/03/2020 | 1    |     | 1    |
| Lebanon      | 17/03/2020 | 1    |     | 1    |
| Lithuania    | 15/03/2020 | 1    |     | 1    |
| Luxembourg   | 16/03/2020 | 1    |     | 1    |
| Malaysia     | 17/03/2020 | 52   |     | 52   |
| Mexico       | 29/03/2020 | 387  |     | 387  |
| Moldova      | 22/03/2020 | 7    |     | 7    |
| Montenegro   | N/A        | 3    |     | 3    |
| Morocco      | 24/03/2020 | 63   |     | 63   |
| Mozambique   | 31/03/2020 | 1    |     | 1    |
| Netherlands  | 22/03/2020 | 114  | 290 | 404  |
| New Zealand  | 25/03/2020 | 140  |     | 140  |
| Nigeria      | 28/03/2020 | 605  |     | 605  |
| Macedonia    | N/A        | 89   |     | 89   |
| Norway       | 23/03/2020 | 314  |     | 314  |
| Pakistan     | 25/03/2020 | 275  |     | 275  |
| Peru         | 17/03/2020 |      | 413 | 413  |
| Philippines  | 21/03/2020 | 272  |     | 272  |
| Poland       | 14/03/2020 | 1623 |     | 1623 |
| Portugal     | 18/03/2020 | 190  |     | 190  |
| Qatar        | 21/03/2020 | 1    |     | 1    |
| Romania      | 20/03/2020 | 371  |     | 371  |
| Russia       | 16/03/2020 | 387  |     | 387  |
| Saudi Arabia | 20/03/2020 | 3    |     | 3    |
| Serbia       | 20/03/2020 | 89   |     | 89   |
| Singapore    | 09/04/2020 | 72   |     | 72   |
| Slovakia     | 15/03/2020 | 128  | 39  | 167  |
| Slovenia     | 19/03/2020 | 35   |     | 35   |
| South Africa | 25/03/2020 | 491  |     | 491  |



|                      |            |      |      |      |
|----------------------|------------|------|------|------|
| South Korea          | 03/02/2020 | 285  |      | 285  |
| Spain                | 16/03/2020 | 5    |      | 5    |
| Sweden               | 24/03/2020 | 354  |      | 354  |
| Switzerland          | 16/03/2020 | 312  | 166  | 478  |
| Thailand             | 17/03/2020 | 8    | 240  | 248  |
| Trinidad and Tobago  | 28/03/2020 | 1    |      | 1    |
| Taiwan               | N/A        | 63   |      | 63   |
| Turkey               | 27/03/2020 | 237  |      | 237  |
| Ukraine              | 17/03/2020 | 2    |      | 2    |
| United Arab Emirates | 26/03/2020 | 12   |      | 12   |
| United Kingdom       | 23/03/2020 | 737  | 195  | 932  |
| United States        | 20/03/2020 | 2892 | 1161 | 4053 |
| Vietnam              | 31/03/2020 | 1    |      | 1    |
| Yemen                | 29/04/2020 | 1    |      | 1    |

---

*Note.* PSA is the Psychological Science Accelerator network. SDT is the self-determination theory network. Stringency date refers to the date that each country implemented measures such as lockdowns and school closures according to the Oxford COVID-19 Government Response Tracker<sup>[5]</sup>.

**Table S2**

*Random intercept models testing condition equivalence on a baseline measure of social distancing adherence, carryover effects, and the effect of condition on the manipulation check*

| Outcome                                                    | term                                | B    | SE  | t      | df       | r <sub>p</sub> | 95% CI around r <sub>p</sub> |       | p     | Variance of random effects |
|------------------------------------------------------------|-------------------------------------|------|-----|--------|----------|----------------|------------------------------|-------|-------|----------------------------|
|                                                            |                                     |      |     |        |          |                | Lower                        | Upper |       |                            |
| Baseline adherence                                         | Controlling (intercept)             | 5.11 | .08 | 64.20  | 72.78    | .014           | .004                         | .027  | <.001 | .392                       |
|                                                            | vs. No message                      | .06  | .02 | 2.40   | 25654.61 | .014           | .002                         | .026  | .017  |                            |
|                                                            | vs. Autonomy supportive             | .03  | .02 | 1.41   | 25651.47 | .008           | .000                         | .020  | .167  |                            |
| Carryover effect on manipulation check (perceived control) | Controlling (intercept)             | 4.21 | .05 | 79.41  | 81.59    | .170           | .158                         | .182  | <.001 | .128                       |
|                                                            | vs. No message                      | -.50 | .03 | -15.98 | 24755.96 | .099           | .086                         | .111  | <.001 |                            |
|                                                            | vs. Autonomy supportive             | -.82 | .03 | -25.92 | 24751.07 | .159           | .147                         | .171  | <.001 |                            |
|                                                            | Carryover (study order)             | -.24 | .04 | -5.84  | 24804.00 | .037           | .025                         | .050  | <.001 |                            |
|                                                            | vs. No message x carryover          | .31  | .06 | 5.56   | 24758.02 | .035           | .022                         | .047  | <.001 |                            |
|                                                            | vs. Autonomy supportive x carryover | .39  | .06 | 6.99   | 24758.26 | .043           | .031                         | .056  | <.001 |                            |
| Manipulation check (perceived control)                     | Controlling (intercept)             | 4.14 | .05 | 80.76  | 70.86    | .163           | .152                         | .176  | <.001 | .128                       |
|                                                            | vs. No message                      | -.40 | .03 | -15.48 | 24760.64 | .096           | .083                         | .108  | <.001 |                            |
|                                                            | vs. Autonomy supportive             | -.69 | .03 | -26.57 | 24752.80 | .163           | .151                         | .175  | <.001 |                            |

*Note.* SE, standard error; df, degrees of freedom; Bs are unstandardized coefficients; r<sub>p</sub> is the partial standardized effect size for each coefficient; CI, Confidence Interval; 1w, 1 week; 6m, 6 months; \*Excluding erroneous data; N = 25,718; Controlling: n = 8,368; No message: n = 8,790; Autonomy supportive: n = 8,560; The controlling message was the reference group; We report three decimal places for r<sub>p</sub> and its CI since our interval null is r<sub>p</sub> = -.025 to .025, and two decimals for all other values.

**Table S3**

Random intercept-only models testing the effect of experimental conditions (Hypothesis 1) and autonomous and controlled motivation (Hypothesis 2), excluding participants who were presented with a different PSACR experiment first

| Outcome                                   | term                    | B     | SE  | t      | df       | $r_p$ | 95% CI around $r_p$ |       |        | Variance of random effects |
|-------------------------------------------|-------------------------|-------|-----|--------|----------|-------|---------------------|-------|--------|----------------------------|
|                                           |                         |       |     |        |          |       | Lower               | Upper | p      |                            |
| Baseline adherence                        | Controlling (intercept) | 5.04  | .08 | 60.38  | 73.23    | .024  | .011                | .039  | < .001 | .402                       |
|                                           | vs. No message          | .09   | .03 | 3.10   | 17674.87 | .022  | .007                | .036  | .002   |                            |
|                                           | vs. Autonomy supportive | .08   | .03 | 2.80   | 17673.30 | .019  | .005                | .034  | .005   |                            |
| Manipulation check (perceived control)    | Controlling (intercept) | 4.22  | .06 | 76.36  | 71.17    | .193  | .179                | .207  | <.001  | .134                       |
|                                           | vs. No message          | -.50  | .03 | -16.08 | 16979.25 | -.120 | -.134               | -.105 | <.001  |                            |
|                                           | vs. Autonomy supportive | -.82  | .03 | -26.05 | 16975.03 | -.192 | -.206               | -.177 | <.001  |                            |
| Autonomous motivation Hypothesis 1        | Controlling (intercept) | 5.99  | .06 | 103.45 | 72.64    | .061  | .047                | .076  | <.001  | .191                       |
|                                           | vs. No message          | -.06  | .02 | -2.99  | 17668.28 | -.021 | -.036               | -.006 | .003   |                            |
|                                           | vs. Autonomy supportive | .11   | .02 | 5.50   | 17666.59 | .038  | .024                | .053  | <.001  |                            |
| Controlled motivation Hypothesis 1        | Controlling (intercept) | 4.57  | .06 | 75.58  | 73.60    | .105  | .091                | .120  | <.001  | .193                       |
|                                           | vs. No message          | -.36  | .03 | -14.20 | 17664.94 | -.101 | -.116               | -.087 | <.001  |                            |
|                                           | vs. Autonomy supportive | -.09  | .03 | -3.71  | 17662.85 | -.027 | -.041               | -.012 | <.001  |                            |
| Defiance Hypothesis 1                     | Controlling (intercept) | 2.80  | .05 | 53.69  | 70.95    | .086  | .072                | .101  | <.001  | .123                       |
|                                           | vs. No message          | -.02  | .03 | -.68   | 17482.80 | -.005 | -.020               | -.000 | .499   |                            |
|                                           | vs. Autonomy supportive | -.30  | .03 | -10.40 | 17480.46 | -.077 | -.091               | -.062 | <.001  |                            |
| Defiance Hypothesis 2                     | Intercept               | 6.12  | .07 | 81.66  | 390.19   | .511  | .501                | .521  | <.001  | .113                       |
|                                           | Autonomous motivation   | -.73  | .01 | -75.90 | 17412.98 | -.509 | -.519               | -.499 | <.001  |                            |
|                                           | Controlled motivation   | .22   | .01 | 28.15  | 17487.76 | .210  | .196                | .224  | <.001  |                            |
| Intention to avoid 1week Hypothesis 1     | Controlling (intercept) | 5.37  | .07 | 75.20  | 74.92    | .027  | .014                | .043  | <.001  | .281                       |
|                                           | vs. No message          | .10   | .03 | 3.60   | 17344.40 | .026  | .011                | .041  | <.001  |                            |
|                                           | vs. Autonomy supportive | .08   | .03 | 2.97   | 17341.69 | .021  | .006                | .036  | .003   |                            |
| Intention to avoid 1week Hypothesis 2     | Intercept               | 2.23  | .08 | 27.78  | 290.95   | .411  | .399                | .423  | <.001  | .171                       |
|                                           | Autonomous motivation   | .54   | .01 | 56.56  | 17356.25 | .399  | .387                | .411  | <.001  |                            |
|                                           | Controlled motivation   | .00   | .01 | -.63   | 17370.00 | .005  | .000                | .020  | .526   |                            |
| Intention to avoid 6 months Hypothesis 1* | Controlling (intercept) | 16.93 | .28 | 59.97  | 72.69    | .003  | .002                | .022  | <.001  | 4.12                       |
|                                           | vs. No message          | -.05  | .12 | -.39   | 16805.33 | -.003 | -.018               | -.000 | .698   |                            |
|                                           | vs. Autonomy supportive | -.04  | .12 | -.37   | 16801.93 | -.003 | -.018               | -.000 | .710   |                            |
| Intention to avoid 6 months Hypothesis 2* | Intercept               | 2.62  | .33 | 7.97   | 365.16   | .454  | .443                | .466  | <.001  | 2.28                       |
|                                           | Autonomous motivation   | 2.66  | .04 | 64.23  | 16762.71 | .453  | .442                | .464  | <.001  |                            |
|                                           | Controlled motivation   | -.39  | .03 | -11.80 | 16817.81 | -.091 | -.106               | -.076 | <.001  |                            |

Note. SE, standard error; df, degrees of freedom; Bs are unstandardized coefficients;  $r_p$  is the partial standardized effect size for each coefficient; CI, Confidence Interval; 1w, 1 week; 6m, 6 months; \*Excluding erroneous data;  $N = 17,729$ ; Controlling:  $n = 5,733$ ; No message:  $n = 6,099$ ; Autonomy supportive:  $n = 5,897$ ; The controlling message was the reference group; We report three decimal places for  $r_p$  and its CI since our interval null is  $r_p = -.025$  to  $.025$ , and two decimals for all other values.

**Table S4**

Random intercept-only models testing effects of experimental conditions (Hypothesis 1) and autonomous and controlled motivation (Hypothesis 2) on outcomes with two exploratory covariates

| Outcome                                   | term                    | B     | SE  | t      | df       | $r_p$ | 95% CI around $r_p$ |       | p     | Variance of random effects |
|-------------------------------------------|-------------------------|-------|-----|--------|----------|-------|---------------------|-------|-------|----------------------------|
|                                           |                         |       |     |        |          |       | Lower               | Upper |       |                            |
| Manipulation check<br>(Perceived control) | Controlling (intercept) | 4.83  | .06 | 76.26  | 177.05   | .209  | .197                | .221  | <.001 | .117                       |
|                                           | vs. No message          | -.40  | .03 | -15.44 | 24325.07 | -.097 | -.109               | -.084 | <.001 |                            |
|                                           | vs. Autonomy-supportive | -.70  | .03 | -26.87 | 24317.92 | -.166 | -.178               | -.154 | <.001 |                            |
|                                           | Baseline adherence      | -.14  | .01 | -19.29 | 23984.63 | -.127 | -.139               | -.115 | <.001 |                            |
|                                           | Total cases per million | .00   | .00 | 1.22   | 6082.97  | .012  | .001                | .024  | .224  |                            |
| Autonomous motivation<br>Hypothesis 1     | Controlling (intercept) | 4.66  | .05 | 89.67  | 125.04   | .364  | .354                | .374  | <.001 | .122                       |
|                                           | vs. No message          | -.05  | .02 | -3.21  | 25030.39 | -.019 | -.032               | -.007 | .001  |                            |
|                                           | vs. Autonomy-supportive | .09   | .02 | 5.70   | 25028.01 | .034  | .022                | .047  | <.001 |                            |
|                                           | Baseline adherence      | .26   | .00 | 60.82  | 25064.62 | .360  | .350                | .371  | <.001 |                            |
|                                           | Total cases per million | .00   | .00 | 1.58   | 17270.05 | .015  | .003                | .027  | .113  |                            |
| Controlled motivation<br>Hypothesis 1     | Controlling (intercept) | 4.16  | .07 | 62.95  | 130.63   | .134  | .122                | .146  | <.001 | .192                       |
|                                           | vs. No message          | -.35  | .02 | -16.62 | 25023.06 | -.100 | -.112               | -.087 | <.001 |                            |
|                                           | vs. Autonomy-supportive | -.10  | .02 | -4.73  | 25020.56 | -.028 | -.041               | -.016 | <.001 |                            |
|                                           | Baseline adherence      | .07   | .01 | 12.96  | 25049.62 | .082  | .070                | .095  | <.001 |                            |
|                                           | Total cases per million | .00   | .00 | 2.79   | 16590.94 | .026  | .014                | .039  | .005  |                            |
| Defiance<br>Hypothesis 1                  | Controlling (intercept) | 3.88  | .06 | 69.86  | 199.58   | .227  | .216                | .239  | <.001 | .081                       |
|                                           | vs. No message          | .00   | .02 | .07    | 24905.93 | .000  | .000                | .014  | .942  |                            |
|                                           | vs. Autonomy-supportive | -.25  | .02 | -10.44 | 24899.51 | .065  | -.077               | -.053 | <.001 |                            |
|                                           | Baseline adherence      | -.22  | .01 | -33.48 | 24347.35 | .215  | -.227               | -.204 | <.001 |                            |
|                                           | Total cases per million | .00   | .00 | .48    | 4874.02  | .005  | .000                | .017  | .630  |                            |
| Defiance<br>Hypothesis 2                  | Intercept               | 6.32  | .07 | 93.47  | 369.06   | .530  | .522                | .538  | <.001 | .101                       |
|                                           | Autonomous motivation   | -.74  | .01 | -86.43 | 24867.53 | -.489 | -.498               | -.480 | <.001 |                            |
|                                           | Controlled motivation   | .23   | .01 | 35.15  | 24882.63 | .220  | .208                | .232  | <.001 |                            |
|                                           | Baseline adherence      | -.04  | .01 | -6.11  | 24844.96 | -.039 | -.052               | -.027 | <.001 |                            |
|                                           | Total cases per million | .00   | .00 | .76    | 9054.44  | .007  | .000                | .020  | .450  |                            |
| Intention to avoid 1w<br>Hypothesis 1     | Controlling (intercept) | 2.84  | .05 | 56.76  | 165.92   | .548  | .540                | .556  | <.001 | .085                       |
|                                           | vs. No message          | .03   | .02 | 1.83   | 24810.66 | .011  | .001                | .024  | .068  |                            |
|                                           | vs. Autonomy-supportive | .01   | .02 | .61    | 24806.20 | .004  | .000                | .016  | .542  |                            |
|                                           | Baseline adherence      | .51   | .01 | 100.17 | 24686.01 | .548  | .540                | .556  | <.001 |                            |
|                                           | Total cases per million | .00   | .00 | -1.54  | 9609.35  | .015  | .003                | .027  | .124  |                            |
| Intention to avoid 1w<br>Hypothesis 2     | Intercept               | 1.09  | .06 | 19.36  | 461.19   | .618  | .611                | .625  | <.001 | .062                       |
|                                           | Autonomous motivation   | .37   | .01 | 50.67  | 24730.85 | .314  | .303                | .325  | <.001 |                            |
|                                           | Controlled motivation   | .01   | .01 | .95    | 24755.76 | .006  | .000                | .019  | .341  |                            |
|                                           | Baseline adherence      | .41   | .01 | 79.59  | 24705.42 | .459  | .450                | .468  | <.001 |                            |
|                                           | Total cases per million | .00   | .00 | -2.10  | 7714.31  | .020  | .008                | .033  | .035  |                            |
| Intention to avoid 6m<br>Hypothesis 1*    | Controlling (intercept) | 10.33 | .25 | 40.74  | 157.10   | .353  | .342                | .364  | <.001 | 2.240                      |
|                                           | vs. No message          | -.12  | .09 | -1.30  | 24427.45 | -.008 | -.021               | -.000 | .195  |                            |
|                                           | vs. Autonomy-supportive | -.26  | .10 | -2.71  | 24422.94 | -.017 | -.029               | -.004 | .007  |                            |
|                                           | Baseline adherence      | 1.44  | .03 | 56.31  | 24329.53 | .347  | .336                | .358  | <.001 |                            |
|                                           | Total cases per million | .00   | .00 | -8.36  | 9780.53  | .081  | .068                | .093  | <.001 |                            |
| Intention to avoid 6m<br>Hypothesis 2*    | Intercept               | 1.05  | .28 | 3.74   | 385.92   | .511  | .503                | .520  | <.001 | 1.680                      |
|                                           | Autonomous motivation   | 2.32  | .04 | 64.46  | 24381.54 | .389  | .378                | .399  | <.001 |                            |
|                                           | Controlled motivation   | -.42  | .03 | -15.46 | 24399.19 | -.100 | -.112               | -.087 | <.001 |                            |
|                                           | Baseline adherence      | .87   | .03 | 34.05  | 24359.35 | .217  | .205                | .229  | <.001 |                            |
|                                           | Total cases per million | .00   | .00 | -9.28  | 8324.73  | .090  | .077                | .102  | <.001 |                            |

Note. SE, standard error; df, degrees of freedom; Bs are unstandardized coefficients;  $r_p$  is the partial standardized effect size for each coefficient; CI, Confidence Interval; 1w, 1 week; 6m, 6 months; \*Excluding erroneous data;

$N = 25,718$ ; Controlling:  $n = 8,368$ ; No message:  $n = 8,790$ ; Autonomy-supportive:  $n = 8,560$ ; The controlling message was the reference group; We report three decimal places for  $r_p$  and its CI since our interval null is  $r_p = -.025$  to  $.025$ , and two decimals for all other values.

**Table S5**

Authorship order within consortium (because of journal page limits, we were unable to list all authors individually and the order here reflects the intended author order).

| <b>PSACR Author</b>              | <b>Institution and Affiliation</b>                                                               | <b>Email</b>                |
|----------------------------------|--------------------------------------------------------------------------------------------------|-----------------------------|
| Nicole Legate (co-first author)  | Illinois Institute of Technology, Department of Psychology, Chicago, Illinois, United States     | nlegate@iit.edu             |
| Thuy-vy Ngyuen (co-first author) | Durham University, Department of Psychology, Durham, United Kingdom                              | thuy-vy.nguyen@durham.ac.uk |
| Netta Weinstein                  | University of Reading, Department of Psychology, Reading, United Kingdom                         | n.weinstein@reading.ac.uk   |
| Arlen Moller                     | Illinois Institute of Technology, Department of Psychology, Chicago, Illinois, United States     | amoller@iit.edu             |
| Lisa Legault                     | Clarkson University, Department of Psychology, Potsdam, New York, United States                  | llegault@clarkson.edu       |
| Zahir Vally                      | United Arab Emirates University, Al Ain, United Arab Emirates                                    | zahir.vally@uaeu.ac.ae      |
|                                  | Wolfson College, University of Oxford, Oxford, United Kingdom                                    |                             |
| Zuzanna Tajchman                 | University of Minnesota, Twin Cities, Department of Psychology, Minneapolis, United States       | ztajchma@umn.edu            |
| Andras N. Zsido                  | Institute of Psychology, University of Pécs, Pécs, Hungary                                       | zsido.andras@pte.hu         |
| Miha Zrimsek                     | University of Ljubljana, Department of Translation Studies, Faculty of Arts, Ljubljana, Slovenia | zrimsekm@gmail.com          |
| Zhang Chen                       | Ghent University, Department of Experimental Psychology, Ghent, Belgium                          | zhang.chen@ugent.be         |
| Ignazio Ziano                    | Grenoble Ecole de Management, Grenoble, France                                                   | ziano.ignazio@gmail.com     |
| Zoi Gialitaki                    | Independent Researcher                                                                           | z.gialitaki@gmail.com       |
| Chris D Ceary                    | Indiana University of Pennsylvania, Indiana, United States                                       | cceary@gmail.com            |
| Yuna Jang                        | Independent Researcher                                                                           | yunajang92@gmail.com        |
| Yijun Lin                        | University of Florida, Department of Psychology, Gainesville, United States                      | yijun.lin@ufl.edu           |

|                      |                                                                                                         |                                               |
|----------------------|---------------------------------------------------------------------------------------------------------|-----------------------------------------------|
| Yoshihiko Kunisato   | Senshu University, Department of Psychology, Kawasaki , Japan                                           | ykunisato@psy.senshu-u.ac.jp                  |
| Yuki Yamada          | Kyushu University, Faculty of Arts and Science, Fukuoka, Japan                                          | yamadayuk@gmail.com                           |
| Qinyu Xiao           | University of Hong Kong, Department of Psychology, Hong Kong SAR, China                                 | xqy1020@connect.hku.hk                        |
| Xiaoming Jiang       | Shanghai International Studies University, Institute of Linguistics, Shanghai, China                    | xiaoming.jiang@shisu.edu.cn                   |
| Xinkai Du            | University of Amsterdam, Amsterdam, Netherlands                                                         | xinkai.du@student.uva.nl                      |
| Elvin Yao            | Claremont Graduate University, Claremont, United States                                                 | xiaohui.yao@cgu.edu                           |
| William S. Ryan      | University of Toronto, St George, Canada                                                                | ws.ryan@utoronto.ca                           |
| John Paul Wilson     | Montclair State University, Montclair, United States                                                    | johnpaulw@gmail.com                           |
| Wilson Cyrus-Lai     | INSEAD, Singapore                                                                                       | wilson-cyrus.lai@insead.edu                   |
| William Jimenez-Leal | Universidad de los Andes, Department of Psychology, Bogotá, Colombia                                    | w.jimenezleal@uniandes.edu.co                 |
| Wilbert Law          | The Education University of Hong Kong, Department of Psychology, Hong Kong, SAR China                   | wlaw@eduhk.hk                                 |
| Wenceslao Unanue     | Universidad Adolfo Ibáñez, School of Business, Santiago, Chile                                          | wenceslao.unanue@uai.cl                       |
| W. Matthew Collins   | Nova Southeastern University, Department of Psychology and Neuroscience, Fort Lauderdale, United States | wc292@nova.edu                                |
| Karley L Richard     | Indiana University of Pennsylvania, Indiana, United States                                              | vymbc@iup.edu                                 |
| Marek Vranka         | Charles University, Prague, Czechia                                                                     | vranka.marek@gmail.com                        |
| Vladislav Ankushev   | HSE University, Moscow, Russia                                                                          | vladislavankushev@yandex.ru                   |
| Vidar Schei          | NHH Norwegian School of Economics, Department of Strategy and Management, Bergen, Norway                | vidar.schei@nhh.no                            |
| Chloe DePaola        | Indiana University of Pennsylvania, Indiana, United States                                              | vhvp@iup.edu                                  |
| Veronika Lerche      | Heidelberg University, Heidelberg, Germany                                                              | veronika.lerche@psychologie.uni-heidelberg.de |

|                           |                                                                                                                                    |                               |
|---------------------------|------------------------------------------------------------------------------------------------------------------------------------|-------------------------------|
| Vanja Kovic               | University of Belgrade, Laboratory for Neurocognition and Applied Cognition, Faculty of Philosophy, Belgrade, Serbia               | vanja.kovic@f.bg.ac.rs        |
| Valerija Križanić         | Josip Juraj Strossmayer University of Osijek, Department of Psychology, Faculty of Humanities and Social Sciences, Osijek, Croatia | vkrizanic@ffos.hr             |
| Veselina Hristova Kadreva | New Bulgarian University, Department of Cognitive Science and Psychology, Sofia, Bulgaria                                          | v.kadreva@gmail.com           |
| Vera Cubela Adoric        | University of Zadar, Department of Psychology, Zadar, Croatia                                                                      | vcubela@unizd.hr              |
| Ulrich S. Tran            | University of Vienna, Department of Cognition, Emotion, and Methods in Psychology, Faculty of Psychology, Vienna, Austria          | ulrich.tran@univie.ac.at      |
| Siu Kit Yeung             | The University of Hong Kong, Hong Kong, SAR China                                                                                  | u3517520@connect.hku.hk       |
| Widad Hassan              | University of East London, Department of Psychology, Dubai, United Arab Emirates                                                   | u1944146@uel.ac.uk            |
| Ralph Houston             | Independent Researcher                                                                                                             | translate@rjfhouston.com      |
| Michael A. Machin         | University of Southern Queensland, Toowoomba, Australia                                                                            | tony.machin@usq.edu.au        |
| Tiago J. S. Lima          | University of Brasília, Department of Social and Work Psychology, Brasilia, Brazil                                                 | tiago.lima@unb.br             |
| Thomas Ostermann          | Witten/Herdecke University, Department of Psychology and Psychotherapy, Witten, Germany                                            | thomas.ostermann@uni-wh.de    |
| Thomas Frizzo             | Université de Lorraine, Université de Strasbourg, CNRS, BETA, Nancy, France                                                        | thomas.frizzo@gmail.com       |
| Therese E Sverdrup        | NHH Norwegian School of Economics, Department of Strategy and Management, Bergen, Norway                                           | therese.sverdrup@nhh.no       |
| Thea House                | Macquarie University, Sydney, Australia<br>University of Bristol, Bristol, United Kingdom                                          | thea.house@students.mq.edu.au |
| Tripat Gill               | Wilfrid Laurier University, Lazaridis School of Business and Economics, Waterloo, Canada                                           | tgill@wlu.ca                  |

|                         |                                                                                                                                   |                                    |
|-------------------------|-----------------------------------------------------------------------------------------------------------------------------------|------------------------------------|
| Maksim Fedotov          | Russian Academy of Sciences,<br>Institute for Linguistic Studies, St.<br>Petersburg, Russia                                       | tequila.lime@gmail.com             |
| Tamar Paltrow           | Independent Researcher                                                                                                            | tepaltrow@aol.com                  |
| Teodor Jernsäter        | Stockholm University, Department of<br>Psychology, Stockholm, Sweden                                                              | teodor.jernsather@psychology.su.se |
| Tasnim Rahman           | University of Dhaka, Dhaka,<br>Bangladesh                                                                                         | tasnimrahman621@gmail.com          |
| Tanya Machin            | University of Southern Queensland,<br>Toowoomba, Australia                                                                        | Tanya.Machin@usq.edu.au            |
| Maria Koptjevskaja-Tamm | Stockholm University, Department of<br>Linguistics, Stockholm, Sweden                                                             | tamm@ling.su.se                    |
| Thomas J. Hostler       | Manchester Metropolitan University,<br>Department of Psychology,<br>Manchester, United Kingdom                                    | t.hostler@mmu.ac.uk                |
| Tatsunori Ishii         | Japan Women's University, Faculty of<br>Integrated Arts and Social Sciences,<br>Tokyo, Japan.                                     | t.ishii1108@gmail.com              |
| Barnabas Szaszi         | ELTE Eötvös Loránd University,<br>Institute of Psychology, Budapest,<br>Hungary                                                   | szaszi.barnabas@ppk.elte.hu        |
| Sylwia Adamus           | Jagiellonian University, Institute of<br>Psychology, Krakow, Poland                                                               | sylwiadamus@gmail.com              |
| Lilian Suter            | ZHAW Zurich University of Applied<br>Sciences, School of Applied<br>Psychology, Winterthur, Switzerland                           | lilian.suter@zhaw.ch               |
| Suparpit M. von Bormann | Suranaree University of Technology,<br>Nakhon Ratchasima, Thailand                                                                | suparpit@gmail.com                 |
| Sumaiya Habib           | University of Dhaka, Department of<br>Clinical Psychology, Dhaka,<br>Bangladesh                                                   | sumaiyahabib14@gmail.com           |
| Anna Studzinska         | Icam Toulouse, Humanities<br>Department, Toulouse, France                                                                         | studzinna@gmail.com                |
| Dragana Stojanovska     | PSA Psihesko, Skopje, North<br>Macedonia                                                                                          | stojanovskadragana.ds@gmail.com    |
| Steve M. J. Janssen     | University of Nottingham Malaysia<br>School of Psychology, Semenyih,<br>Malaysia                                                  | steve.janssen@nottingham.edu.my    |
| Stefan Stieger          | Karl Landsteiner University of Health<br>Sciences, Department of Psychology<br>and Psychodynamics, Krems an der<br>Donau, Austria | stefan.stieger@kl.ac.at            |



|                       |                                                                                                                                   |                              |
|-----------------------|-----------------------------------------------------------------------------------------------------------------------------------|------------------------------|
| Stefan E. Schulenberg | University of Mississippi, Department of Psychology, Oxford, Mississippi, United States                                           | sschulen@olemiss.edu         |
|                       | University of Mississippi, Clinical-Disaster Research Center, Oxford, Mississippi, United States                                  |                              |
| Srinivasan Tatachari  | T A Pai Management Institute, Manipal Academy of Higher Education, Karnataka, India                                               | srini.tata@gmail.com         |
| Soufian Azouaghe      | Mohammed V University in Rabat, Department of Psychology, Rabat, Morocco<br>Université Grenoble Alpes, LIP/PC2S, Grenoble, France | s.azouaghe@um5r.ac.ma        |
| Piotr Sorokowski      | University of Wroclaw, Institute of Psychology, Wroclaw, Poland                                                                   | sorokowskipiotr@yahoo.co.uk  |
| Agnieszka Sorokowska  | University of Wroclaw, Institute of Psychology, Wroclaw, Poland                                                                   | Sorokowska@gmail.com         |
| Xin Song              | University of Minnesota, Twin Cities, Department of Psychology, Minneapolis, United States                                        | songx953@umn.edu             |
| Sofie Morbée          | Department of Developmental, Personality and Social Psychology, Ghent University                                                  | Sofie.Morbee@UGent.be        |
| Savannah Lewis        | Ashland University, Ashland, United States                                                                                        | slewis5920@gmail.com         |
| Sladjana Sinkolova    | PSA Psihesko, Skopje, North Macedonia                                                                                             | sinkolova.s@gmail.com        |
| Dmitry Grigoryev      | National Research University Higher School of Economics, Moscow, Russia                                                           | dgrigoryev@hse.ru            |
| Shira Meir Drexler    | Department of Neurology, Mauritius Hospital Meerbusch, Meerbusch, Germany                                                         | shira.meir@gmail.com         |
| Shimrit Daches        | Bar-Ilan University, Department of Psychology, Ramat Gan, Israel                                                                  | shimrit.daches@biu.ac.il     |
| Shelby L. Levine      | McGill University, Montreal Canada                                                                                                | shelby.levine@mail.mcgill.ca |
| Shawn N. Geniole      | University of the Fraser Valley, Department of Psychology, Abbotsford, Canada                                                     | shawngeniole@gmail.com       |
| Shahunur Akter        | University of Dhaka, Dhaka, Bangladesh                                                                                            | Shahinoorakter27@gmail.com   |
| Selena Vračar         | University of Belgrade, Department of Psychology, Belgrade, Serbia                                                                | selenavracar1410@gmail.com   |

|                        |                                                                                                                                                                             |                                      |
|------------------------|-----------------------------------------------------------------------------------------------------------------------------------------------------------------------------|--------------------------------------|
| Sébastien Massoni      | Université de Lorraine, Université de Strasbourg, CNRS, BETA, Nancy, France                                                                                                 | sebastien.massoni@gmail.com          |
| Sebastiano Costa       | Università degli Studi della Campania Luigi Vanvitelli, Caserta, Italy                                                                                                      | sebastiano.costa@unicampania.it      |
| Saša Zorjan            | University of Maribor, Department of Psychology, Maribor, Slovenia                                                                                                          | sasa.zorjan1@um.si                   |
| Eylul Sarioguz         | Sapienza University of Rome, Doctoral School of Psychological Sciences, Department of Developmental Psychology and Socialization Processes, Rome, Italy                     | sarioguzeylul@gmail.com              |
| Sara Morales Izquierdo | University of Warwick, Coventry United Kingdom                                                                                                                              | sara.morales-izquierdo@warwick.ac.uk |
| Sarah Suzette Tshonda  | Independent Researcher                                                                                                                                                      | sarahsuzette91@gmail.com             |
| Sara G Alves           | University of Porto, Center for Psychology at University of Porto, Porto, Portugal                                                                                          | up201304933@edu.fpce.up.pt           |
| Sara Pöntinen          | Åbo Akademi University, Faculty of Arts, Psychology and Theology, Turku, Finland                                                                                            | sara.pontinen@gmail.com              |
| Sara Álvarez Solas     | Universidad Regional Amazónica Ikiam, Grupo de investigación en Biogeografía y Ecología Espacial (BioGeoE2), Tena, Ecuador                                                  | sara.alvarez.solas@gmail.com         |
| Santiago Ordoñez-Riaño | University of Guadalajara, Guadalajara, Colombia                                                                                                                            | santiagoordz@gmail.com               |
| Sanja Batić Očovaj     | Union University, Faculty of Legal and Business Studies Dr Lazar Vrkatic, Department of Psychology, Novi Sad, Serbia                                                        | sanja.batic@gmail.com                |
| Sandersan Onie         | Black Dog Institute, Sydney, Australia<br>University of New South Wales, School of Psychology, Sydney, Australia<br>Emotional Health for All Foundation, Jakarta, Indonesia | sandy.onie@gmail.com                 |
| Samuel Lins            | University of Porto, Center for Psychology at University of Porto, Porto, Portugal                                                                                          | samuellins@fpce.up.pt                |
| Theresa Biberauer      | University of Cambridge, Cambridge, United Kingdom<br>Stellenbosch University, Stellenbosch, South Africa                                                                   | samt23@gmail.com                     |

|                       |                                                                                                                                    |                                   |
|-----------------------|------------------------------------------------------------------------------------------------------------------------------------|-----------------------------------|
|                       | University of the Western Cape, Cape Town, South Africa                                                                            |                                   |
| Sami Çoksan           | Erzurum Technical University, Department of Psychology, Erzurum, Turkey                                                            | sami.coksan@erzurum.edu.tr        |
| Sakda Khumkom         | Suranaree University of Technology, Nakhon Ratchasima, Thailand                                                                    | sakdakh@sut.ac.th                 |
| Asli Sacakli          | Independent Researcher                                                                                                             | sacakliasli@gmail.com             |
| Susana Ruiz-Fernández | FOM University of Applied Sciences, Essen, Germany                                                                                 | s.ruiz-fernandez@iwm-tuebingen.de |
| Sandra J. Geiger      | University of Amsterdam, Department of Psychology, Faculty of Social and Behavioural Sciences, Amsterdam, Netherlands              | sandra.geiger@univie.ac.at        |
| Saeideh FatahModares  | Urmia University, Department of Sport Management, Faculty of Physical Education and Sport Science, Urmia, Iran                     | s.fmodares@yahoo.com              |
| Radoslaw B. Walczak   | University of Opole, Institute of Psychology, Opole, Poland                                                                        | rwalczak@uni.opole.pl             |
| Ruben Betlehem        | Josip Juraj Strossmayer University of Osijek, Faculty of Humanities and Social Sciences, Department of Psychology, Osijek, Croatia | rbetlehem@ffos.hr                 |
| Roosevelt Vilar       | Universidade Cruzeiro do Sul, São Paulo, Brazil                                                                                    | roosevelt.vilar@gmail.com         |
| Rodrigo A. Cárcamo    | University of Magallanes, Department of Psychology, Punta Arenas, Chile                                                            | rodrigo.carcamo@umag.cl           |
| Robert M Ross         | Macquarie University, Department of Psychology, Sydney, Australia                                                                  | robross46@gmail.com               |
| Randy McCarthy        | Northern Illinois University Department of Psychology, DeKalb, United States                                                       | rmccarthy3@niu.edu                |
| Tonia Ballantyne      | Indiana University of Pennsylvania, Indiana, United States                                                                         | rjxx@iup.edu                      |
| Erin C. Westgate      | University of Florida, Department of Psychology, Gainesville, United States                                                        | erinwestgate@ufl.edu              |
| Richard M. Ryan       | Australian Catholic University, Institute for Positive Psychology and Education, Sydney, Australia                                 | richard.ryan@acu.edu.au           |
| Rafael Gargurevich    | Pontifical Catholic University of Peru, Lima, Peru                                                                                 | rgargurevich@pucp.pe              |

|                             |                                                                                                                                                                       |                                 |
|-----------------------------|-----------------------------------------------------------------------------------------------------------------------------------------------------------------------|---------------------------------|
| Reza Afhami                 | Tarbiat Modares University,<br>Department of Art Studies, Tehran,<br>Iran                                                                                             | Afhami@modares.ac.ir            |
| Dongning Ren                | Tilburg University, Department of<br>Social Psychology, Tilburg,<br>Netherlands                                                                                       | d.ren@uvt.nl                    |
| Renan P. Monteiro           | Federal University of Mato Grosso,<br>Department of Psychology, Cuiabá,<br>Brazil                                                                                     | renanpmonteiro@gmail.com        |
| Ulf-Dietrich Reips          | University of Konstanz, Department<br>of Psychology, Konstanz, Switzerland                                                                                            | reips@uni-konstanz.de           |
| Niv Reggev                  | Ben Gurion University, Department<br>of Psychology and Zlotowski Center<br>for Neuroscience, Beersheba, Israel                                                        | reggevn@bgu.ac.il               |
| Robert J Calin-<br>Jageman  | Dominican University, Department of<br>Psychology, River Forest, United<br>States                                                                                     | rcalinjageman@dom.edu           |
| Razieh Pourafshari          | University of Tehran, Department of<br>Psychology, Faculty of Psychology<br>and Education, Tehran, Iran                                                               | razielh.pourafshari@gmail.com   |
| Raquel Oliveira             | Iscte-Instituto Universitário de<br>Lisboa, CIS-IUL, Lisbon, Portugal<br>Intelligent Agents and Synthetic<br>Characters Group (GAIPS), INESC-<br>ID, Lisbon, Portugal | rsaoa@iscte-iul.pt              |
| Mina Nedelcheva-<br>Datsova | Sofia University St. Kliment<br>Ohridski, Department of General,<br>Experimental, Developmental, and<br>Health Psychology, Sofia, Bulgaria                            | raiskopruskalo@gmail.com        |
| Rima-Maria Rahal            | Max Planck Institute for Research on<br>Collective Goods, Bonn, Germany<br>Tilburg University, Tilburg,<br>Netherlands                                                | rahal@coll.mpg.de               |
| Rafael R Ribeiro            | Iscte - Instituto Universitário de<br>Lisboa, CIS-IUL, Lisbon, Portugal                                                                                               | rafael_ribeiro@iscte-iul.pt     |
| Theda Radtke                | University of Wuppertal, Department<br>of Psychology, Wuppertal, Germany                                                                                              | Radtke@uni-wuppertal.de         |
| Rachel Searston             | The University of Adelaide, Adelaide,<br>Australia                                                                                                                    | rachel.searston@adelaide.edu.au |
| Rachadaporn Jai-ai          | Suranaree University of Technology,<br>Nakhon Ratchasima, Thailand                                                                                                    | rachadaporn@sut.ac.th           |
| Redeate Habte               | Jacobs University Bremen, Bremen,<br>Germany                                                                                                                          | redhabte@gmail.com              |

|                                |                                                                                                                                                                              |                                   |
|--------------------------------|------------------------------------------------------------------------------------------------------------------------------------------------------------------------------|-----------------------------------|
| Przemysław Zdybek              | University of Opole, Institute of Psychology, Opole, Poland                                                                                                                  | pzdybek@uni.opole.pl              |
| Sau-Chin Chen                  | Tzu-Chi University, Department of Human Development and Psychology, Hualien, Taiwan                                                                                          | pmsp96@gmail.com                  |
| Piyaorn Wajanatinapart         | Suranaree University of Technology, Nakhon Ratchasima, Thailand                                                                                                              | piyaorn@g.sut.ac.th               |
| Princess Lovella G. Maturan    | University of the Philippines Diliman, Department of Psychology, Quezon City, Philippines                                                                                    | pgmaturan@up.edu.ph               |
| Jennifer T Perillo             | Indiana University of Pennsylvania, Department of Psychology, Indiana, United States                                                                                         | jperillo@iup.edu                  |
| Peder Mortvedt Isager          | Eindhoven University of Technology, Department of Industrial Engineering and Innovation Sciences, Eindhoven, Netherlands                                                     | pederisager@gmail.com             |
| Pavol Kačmár                   | Pavol Jozef Šafárik University in Košice, Department of Psychology, Faculty of Arts, Košice, Slovakia                                                                        | pavol.kacmar@upjs.sk              |
| Paulo Manuel Macapagal         | Arellano University, School of Psychology, Manila, Philippines                                                                                                               | paulo.macapagal@arellano.edu.ph   |
| Michael R. Maniaci             | Department of Psychology, Florida Atlantic University                                                                                                                        | mmaniaci@fau.edu                  |
| Paulina Szwed                  | Jagiellonian University, Krakow, Poland                                                                                                                                      | paulina.szwed@uj.edu.pl           |
| Paul H. P. Hanel               | University of Essex, Essex, United Kingdom                                                                                                                                   | p.hanel@essex.ac.uk               |
| Paul A G Forbes                | University of Vienna, Social, Cognitive and Affective Neuroscience Unit, Department of Cognition, Emotion, and Methods in Psychology, Faculty of Psychology, Vienna, Austria | paul.forbes@univie.ac.at          |
| Patricia Arriaga               | Iscte - Instituto Universitário de Lisboa, CIS-IUL, Lisbon, Portugal                                                                                                         | patricia.arriaga@iscte-iul.pt     |
| Bastien Paris                  | Université Grenoble Alpes, Grenoble, France                                                                                                                                  | paris.bastien@hotmail.com         |
| Neha Parashar                  | Sampurna Montfort College, Bangalore, India                                                                                                                                  | parashar3@gmail.com               |
| Konstantinos Papachristopoulos | Concordia University, Montreal, Canada<br><br>Athens University of Economics and Business, Athens, Greece                                                                    | papachristopouloskostas@gmail.com |

|                            |                                                                                                                                                                                                                   |                              |
|----------------------------|-------------------------------------------------------------------------------------------------------------------------------------------------------------------------------------------------------------------|------------------------------|
| Pablo Sebastián Correa     | Universidad Nacional de Córdoba (UNC), Facultad de Psicología; Instituto de Investigaciones Psicológicas (IIPsi) - Consejo Nacional de Investigaciones Científicas y Técnicas (CONICET) - UNC, Córdoba, Argentina | pablocorrea@unc.edu.ar       |
| Ondřej Kácha               | University of Cambridge, Department of Psychology, Cambridge, United Kingdom                                                                                                                                      | oek22@cantab.ac.uk           |
| Márcia Bernardo            | Universidade do Porto, Faculdade de Psicologia e Ciências da Educação,, Porto, Portugal                                                                                                                           | oliviabernardo95@gmail.com   |
| Olatz Campos               | University of Deusto, Bilbao, Spain                                                                                                                                                                               | olatzcampos4@gmail.com       |
| Olalla Niño Bravo          | Independent Researcher                                                                                                                                                                                            | olallanino3@gmail.com        |
| Oscar J Galindo-Caballero  | Universidad de los Andes, Department of Psychology, Bogotá, Colombia<br>Universidad Manuela Beltran, Faculty of Education, Human and Social Sciences, Bogotá, Colombia.                                           | oj.galindo10@uniandes.edu.co |
| Chisom Esther Ogbonnaya    | Alex Ekwueme Federal University, Ndufu-Alike, Nigeria                                                                                                                                                             | ogbonnaya.chisom@yahoo.com   |
| Olga Bialobrzaska          | SWPS University of Social Sciences and Humanities, Warsaw, Poland                                                                                                                                                 | obialobrzaska@swps.edu.pl    |
| Natalia Kiselnikova        | Psychological Institute of Russian Academy of Education, Moscow, Russia                                                                                                                                           | nv_psy@mail.ru               |
| Nicolle Simonovic          | Kent State University, Department of Psychological Sciences, Kent, United States                                                                                                                                  | nsimonov@kent.edu            |
| Noga Cohen                 | University of Haifa, Department of Special Education and The Edmond J. Safra Brain Research Center for the Study of Learning Disabilities, Haifa, Israel                                                          | noga.cohen@edu.haifa.ac.il   |
| Nora L. Nock               | Case Western Reserve University, Department of Population and Quantitative Health Sciences, Cleveland, Ohio, United States                                                                                        | nln@case.edu                 |
| Alejandrina Hernandez      | Universidad Nacional Autonoma de Mexico, Mexico City, Mexico                                                                                                                                                      | nina.hp@hotmail.com          |
| Cecilie Thogersen-Ntoumani | University of Southern Denmark, Department of Sports Sciences and Clinical Biomechanics, Odense, Denmark                                                                                                          | cthogersen@health.sdu.dk     |

|                            |                                                                                                                                            |                                    |
|----------------------------|--------------------------------------------------------------------------------------------------------------------------------------------|------------------------------------|
| Nikos Ntoumanis            | University of Southern Denmark,<br>Department of Sports Sciences and<br>Clinical Biomechanics, Odense,<br>Denmark                          | nntoumanis@health.sdu.dk           |
| Niklas Johannes            | University of Oxford, Oxford Internet<br>Institute, Oxford, United Kingdom                                                                 | niklas.johannes@oii.ox.ac.uk       |
| Nihan Albayrak-<br>Aydemir | London School of Economics and<br>Political Science, London, United<br>Kingdom & Open University, Milton<br>Keynes, United Kingdom         | n.albayrak1@lse.ac.uk              |
| Nicolas Say                | Prague University of Economics and<br>Business, Prague, Czechia                                                                            | sayn00@vse.cz                      |
| Andreas B. Neubauer        | DIPF   Leibniz Institute for Research<br>and Information in Education,<br>Frankfurt am Main, Germany                                       | neubauer.andreas@dipf.de           |
| Neil I. Martin             | University of Southern Queensland,<br>Toowoomba, Australia                                                                                 | neil.martin@usq.edu.au             |
| Neil Levy                  | Macquarie University, Department of<br>Philosophy, Sydney, Australia                                                                       | neil.levy@mq.edu.au                |
| Nathan Torunsky            | University of Minnesota, Twin Cities,<br>Department of Psychology,<br>Minneapolis, United States                                           | torun005@umn.edu                   |
| Natasha van<br>Antwerpen   | University of Adelaide, Adelaide,<br>Australia                                                                                             | vananata10@gmail.com               |
| Natalia Van Doren          | The Pennsylvania State University,<br>Department of Psychology, State<br>College, United States                                            | nataliavandoren@psu.edu            |
| Naoyuki Sunami             | University of Delaware, Newark,<br>United States                                                                                           | nsunami@udel.edu                   |
| Nikolay R. Rachev          | Sofia University St. Kliment<br>Ohridski, Department of General,<br>Experimental, Developmental, and<br>Health Psychology, Sofia, Bulgaria | nrrachev@phls.uni-sofia.bg         |
| Nadyanna M Majeed          | Singapore Management University,<br>School of Social Sciences, Singapore                                                                   | nadyannam.2020@msps.smu.edu.s<br>g |
| Nadya-Daniela<br>Schmidt   | University of Hildesheim, Institute of<br>Psychology, Hildesheim, Germany                                                                  | schmidtn@uni-hildesheim.de         |
| Khaoula Nadif              | Independent Researcher                                                                                                                     | nadifkhaoula@gmail.com             |
| Nadia S Corral-Frías       | Universidad de Sonora, Sonora,<br>Mexico                                                                                                   | nadia.corral@unison.mx             |
| Nihal Ouherrou             | Paul Valery Montpellier 3 University,<br>Lhumain Laboratory, Montpellier,<br>France                                                        | nihal.ouherrou@umontpellier.fr     |

|                                   |                                                                                                                                                                                                                   |                             |
|-----------------------------------|-------------------------------------------------------------------------------------------------------------------------------------------------------------------------------------------------------------------|-----------------------------|
| Nida Abbas                        | Jacobs University Bremen, Bremen, Germany                                                                                                                                                                         | adinxabbas@gmail.com        |
| Myrto Pantazi                     | University of Oxford, Oxford Internet Institute, Oxford, United Kingdom                                                                                                                                           | myrto.pantazi@oii.ox.ac.uk  |
| Marc Y Lucas                      | Universidad de Sonora, Department of Psychology, Sonora, Mexico                                                                                                                                                   | mylucas@email.arizona.edu   |
| Martin R. Vasilev                 | Bournemouth University, Department of Psychology, Poole, United Kingdom                                                                                                                                           | mvasilev@bournemouth.ac.uk  |
| María Victoria Ortiz              | Universidad Nacional de Córdoba (UNC), Facultad de Psicología; Instituto de Investigaciones Psicológicas (IIPsi) - Consejo Nacional de Investigaciones Científicas y Técnicas (CONICET) - UNC, Córdoba, Argentina | mv.ortiz@unc.edu.ar         |
| Muhammad Mussaffa Butt            | Government College University, Lahore, Pakistan                                                                                                                                                                   | mussaffa@gmail.com          |
| Murathan Kurfali                  | Stockholm University, Linguistics Department, Stockholm, Sweden                                                                                                                                                   | murathan.kurfali@ling.su.se |
| Muhib Kabir                       | Bangladesh Clinical Psychology Society, Dhaka, Bangladesh                                                                                                                                                         | Muhib_cu@yahoo.com          |
| Rafał Muda                        | Maria Curie-Skłodowska University, Faculty of Economics, Lublin, Poland                                                                                                                                           | muda.research@gmail.com     |
| María del Carmen MC Tejada Rivera | University of Desarrollo, Faculty of Psychology, Santiago, Chile                                                                                                                                                  | mtejadar@udd.cl             |
| Miroslav Sirota                   | University of Essex, Essex, United Kingdom                                                                                                                                                                        | msirota@essex.ac.uk         |
| Martin Seehuus                    | Middlebury College, Department of Psychology, Middlebury, United States<br>University of Vermont, Vermont Psychological Services, Burlington, United States                                                       | mseehuus@middlebury.edu     |
| Michał Parzuchowski               | SWPS University of Social Sciences and Humanities in Sopot, Center for Research on Cognition and Behavior, Sopot, Poland                                                                                          | mparzuchowski@swps.edu.pl   |
| Mónica Toro                       | University of Desarrollo, Faculty of Psychology, Santiago, Chile                                                                                                                                                  | motorov@udd.cl              |
| Monika Hricova                    | Pavol Jozef Šafárik University in Košice, Department of Psychology, Faculty of Arts, Košice, Slovakia                                                                                                             | monika.hricova@upjs.sk      |



|                             |                                                                                                                                                                          |                                    |
|-----------------------------|--------------------------------------------------------------------------------------------------------------------------------------------------------------------------|------------------------------------|
| Mónica Alarcón<br>Maldonado | Independent Researcher                                                                                                                                                   |                                    |
| Panagiotis Rentzelas        | Department of Psychology and<br>Human Development, IOE UCL's<br>Faculty of Education and Society,<br>University College London, London,<br>United Kingdom                | p.rentzelas@ucl.ac.uk              |
| Maarten Vansteenkiste       | Department of Developmental,<br>Personality and Social Psychology,<br>Ghent University                                                                                   | Maarten.Vansteenkiste@ugent.be     |
| Molly A. Metz               | University of Toronto, Toronto,<br>Canada                                                                                                                                | molly.metz@utoronto.ca             |
| Magdalena Marszalek         | SWPS University of Social Sciences<br>and Humanities, Warsaw, Poland                                                                                                     | mmarszalek4@st.swps.edu.pl         |
| Maria Karekla               | University of Cyprus, Nicosia,<br>Cyprus                                                                                                                                 | mkarekla@ucy.ac.cy                 |
| Giovanna Mioni              | University of Padova, Department of<br>General Psychology, Padua, Italy                                                                                                  | giovanna.mioni@unipd.it            |
| Minke Jasmijn Bosma         | University of Amsterdam,<br>Department of Psychology,<br>Amsterdam, Netherlands                                                                                          | minke.bosma@student.uva.nl         |
| Minja Westerlund            | Åbo Akademi University, Faculty of<br>Arts, Psychology and Theology,<br>Turku, Finland                                                                                   | minja.westerlund@abo.fi            |
| Milica Vdovic               | Singidunum University, Faculty of<br>Media and Communications,<br>Department of Psychology, Belgrade,<br>Serbia                                                          | milica.vdovic@fmk.edu.rs           |
| Michal Bialek               | University of Wroclaw, Institute of<br>Psychology, Wroclaw, Poland                                                                                                       | michal.bialek3@uwr.edu.pl          |
| Miguel A. Silan             | University of the Philippines Diliman,<br>Quezon City, Philippines                                                                                                       | MiguelSilan@gmail.com              |
| Michele Anne                | University of Nottingham Malaysia,<br>School of Psychology, Semenyih,<br>Malaysia                                                                                        | michele.anne@dmu.ac.uk             |
| Michal Misiak               | University of Wroclaw, Institute of<br>Psychology, Wroclaw, Poland<br>University of Oxford, School of<br>Anthropology & Museum<br>Ethnography, Oxford, United<br>Kingdom | michal.misiak@uwr.edu.pl           |
| Maria C. Gugliandolo        | Università di Messina, Dipartimento<br>DIMED, Messina, Italy                                                                                                             | mariacristina.gugliandolo@unime.it |

|                                   |                                                                                                                                                                                                                                       |                              |
|-----------------------------------|---------------------------------------------------------------------------------------------------------------------------------------------------------------------------------------------------------------------------------------|------------------------------|
| Maurice Grinberg                  | New Bulgarian University,<br>Department of Cognitive Science and<br>Psychology, Research Center for<br>Cognitive Science, Sofia, Bulgaria                                                                                             | mgrinberg@nbu.bg             |
| Mariagrazia Capizzi               | Université Paul Valéry Montpellier 3,<br>Montpellier, France                                                                                                                                                                          | mgcapizzi@hotmail.com        |
| Mauricio F. Espinoza<br>Barría    | University of Desarrollo, Faculty of<br>Psychology, Santiago, Chile                                                                                                                                                                   | mespinozab@udd.cl            |
| Merve A. Kurfali                  | Bilkent University, Department of<br>Political Science, Ankara, Turkey                                                                                                                                                                | merve.akdemir@bilkent.edu.tr |
| Michael C Mensink                 | University of Wisconsin-Stout,<br>Department of Psychology,<br>Menomonie, United States                                                                                                                                               | mensinkm@uwstout.edu         |
| Mikayel Harutyunyan               | Charles University, Institute of<br>Economic Studies, Prague, Czechia                                                                                                                                                                 | 75686400@fsv.cuni.cz         |
| Meetu Khosla                      | University of Delhi, Psychology<br>Department, DRC, Delhi, India                                                                                                                                                                      | meetukhosla@yahoo.co.in      |
| Megan R. Dunn                     | Illinois Institute of Technology,<br>Chicago, USA                                                                                                                                                                                     | mdunn2@hawk.iit.edu          |
| Max Korbmacher                    | University of Bergen, Faculty of<br>Psychology, Department of<br>Biological and Medical Psychology,<br>Bergen, Norway<br>Western Norway University of<br>Applied Sciences, Department of<br>Health and Functioning, Bergen,<br>Norway | max.korbmacher@gmail.com     |
| Matúš Adamkovič                   | University of Presov, Institute of<br>Psychology, Faculty of Arts, Presov,<br>Slovakia<br>CSPS Slovak Academy of Sciences,<br>Institute of Social Sciences, Slovakia                                                                  | matho.adamkovic@gmail.com    |
| Matheus Fernando<br>Felix Ribeiro | University of Brasilia, Institute of<br>Psychology, Brasilia, Brazil                                                                                                                                                                  | matheusfelix.psi@gmail.com   |
| Maria Terskova                    | HSE University, Moscow, Russia                                                                                                                                                                                                        | materskova@gmail.com         |
| Matej Hruška                      | Comenius University in Bratislava,<br>Institute of European Studies and<br>International Relations, Faculty of<br>Social and Economic Sciences,<br>Bratislava, Slovakia                                                               | matej.hruska@fses.uniba.sk   |
| Marcel Martončík                  | University of Presov, Faculty of Arts,<br>Presov, Slovakia; Institute of Social<br>Sciences CSPS SAS, Slovakia                                                                                                                        | martoncik@protonmail.ch      |
| Martine Jansen                    | Fontys University of Applied<br>Sciences, Eindhoven, Netherlands                                                                                                                                                                      | martine.jansen@gmail.com     |

|                           |                                                                                                                                                                                                              |                                        |
|---------------------------|--------------------------------------------------------------------------------------------------------------------------------------------------------------------------------------------------------------|----------------------------------------|
| Martin Voracek            | University of Vienna, Department of Cognition, Emotion, and Methods in Psychology, Faculty of Psychology, Vienna, Austria                                                                                    | martin.voracek@univie.ac.at            |
| Martin Čadek              | Leeds Beckett University, Carnegie School of Sport, Leeds, United Kingdom                                                                                                                                    | cadekmail@gmail.com                    |
| Martha Frias-Armenta      | Universidad de Sonora, Sonora, Mexico                                                                                                                                                                        | martha.frias@unison.mx                 |
| Marta Kowal               | University of Wroclaw, Institute of Psychology, Wroclaw, Poland                                                                                                                                              | marta7kowal@gmail.com                  |
| Marta Topor               | University of Surrey, School of Psychology, Guildford, United Kingdom                                                                                                                                        | m.topor@surrey.ac.uk                   |
| Marta Roczniowska         | SWPS University of Social Sciences and Humanities in Sopot, Department of Psychology, Sopot, Poland<br>Karolinska Institutet, Department of Learning, Informatics, Management, and Ethics, Stockholm, Sweden | marta.roczniowska@swps.edu.pl          |
| Marlies Oosterlinck       | Independent Researcher                                                                                                                                                                                       | marliesoosterlinck@gmail.com           |
| Markéta Braun Kohlová     | Charles University, Environment Centre, Czechia                                                                                                                                                              | marketa.braun.kohlova@czp.cuni.cz      |
| Mariola Paruzel-Czachura  | Institute of Psychology, University of Silesia in Katowice, Poland & Faculty of Psychology, Complutense University of Madrid, Spain                                                                          | mariola.paruzel-czachura@us.edu.pl     |
| Marina Sabristov          | Independent Researcher                                                                                                                                                                                       | marina.sabristov@gmail.com             |
| Marina Romanova           | HSE University, Moscow, Russia                                                                                                                                                                               | marina.romanova.msk@gmail.com          |
| Marietta Papadatou-Pastou | National and Kapodistrian University of Athens, Athens, Greece                                                                                                                                               | marietta.papadatou-pastou@seh.oxon.org |
| Maria Louise Lund         | University of Oslo, Oslo, Norway                                                                                                                                                                             | marialouiselund@hotmail.com            |
| Maria Antoniadis          | University of Cyprus, Nicosia, Cyprus                                                                                                                                                                        | maria.antoniadis867@gmail.com          |
| Maria Elena Magrin        | University of Milano – Bicocca, Italy                                                                                                                                                                        | mariaelena.magrin@unimib.it            |
| Marc V Jones              | Manchester Metropolitan University, Department of Psychology, Manchester, United Kingdom                                                                                                                     | marc.jones@mmu.ac.uk                   |
| Manyu Li                  | University of Louisiana at Lafayette, Lafayette, United States                                                                                                                                               | manyu.li@louisiana.edu                 |
| Manuel S Ortiz            | Universidad de La Frontera, Departamento de Psicología.                                                                                                                                                      | manuel.ortiz@ufrontera.cl              |

|                               |                                                                                                                       |                                |
|-------------------------------|-----------------------------------------------------------------------------------------------------------------------|--------------------------------|
|                               | Laboratorio de Estrés y Salud,<br>Temuco, Chile                                                                       |                                |
| Mathi Manavalan               | University of Minnesota, Twin Cities,<br>Department of Psychology,<br>Minneapolis, United States                      | manav003@umn.edu               |
| Abdumalik Muminov             | Independent Researcher                                                                                                | malik.traductor@gmail.com      |
| Małgorzata Kossowska          | Jagiellonian University, Department<br>of Philosophy, Institute of<br>Psychology, Krakow, Poland                      | malgorzata.kossowska@uj.edu.pl |
| Maja Friedemann               | University of Oxford, Oxford, United<br>Kingdom                                                                       | maja.friedemann@sjc.ox.ac.uk   |
| Magdalena Wielgus             | Jagiellonian University, Institute of<br>Applied Psychology, Krakow, Poland                                           | magda.wielgus@uj.edu.pl        |
| Madelon L.M. van<br>Hooff     | Radboud University, Behavioural<br>Science Institute, Nijmegen, the<br>Netherlands                                    | madelon.vanhooff@ru.nl         |
| Marco A. C. Varella           | University of São Paulo, Institute of<br>Psychology, Department of<br>Experimental Psychology, São Paulo,<br>Brazil   | macvarella@usp.br              |
| Martyn Standage               | University of Bath, Centre for<br>Motivation and Health Behaviour<br>Change, Department for Health,<br>United Kingdom | m.standage@bath.ac.uk          |
| Matilde Nicolotti             | University of Milano-Bicocca,<br>Department of Psychology, Milan,<br>Italy                                            | m.nicolotti@campus.unimib.it   |
| Melissa F Colloff             | University of Birmingham,<br>Birmingham, United Kingdom                                                               | m.colloff@bham.ac.uk           |
| Maria Bradford                | Universidad de los Andes,<br>Department of Psychology, Bogotá,<br>Colombia                                            | m.bradford10@uniandes.edu.co   |
| Leigh Ann Vaughn              | Ithaca College, Ithaca, NY, United<br>States                                                                          | Lvaughn@ithaca.edu             |
| Luis Eudave                   | Universidad de Navarra, Pamplona,<br>Spain                                                                            | luiseudave@gmail.com           |
| Luc Vieira                    | Université de Paris, Paris, France                                                                                    | lucvieira@protonmail.com       |
| Jackson G. Lu                 | Massachusetts Institute of<br>Technology, Cambridge, United<br>States                                                 | lu18@mit.edu                   |
| Lina Maria Sanabria<br>Pineda | Universidad de los Andes,<br>Department of Psychology, Bogotá,<br>Colombia                                            | lsanabriapineda@gmail.com      |

|                                |                                                                                                                                                                              |                                     |
|--------------------------------|------------------------------------------------------------------------------------------------------------------------------------------------------------------------------|-------------------------------------|
| Lennia Matos                   | Pontifical Catholic University of Peru, Lima, Peru                                                                                                                           | lmatosf@puccp.pe                    |
| Laura Calderón Pérez           | Universidad de los Andes, Department of Psychology, Bogotá, Colombia                                                                                                         | lm.calderon10@uniandes.edu.co       |
| Ljiljana B. Lazarevic          | University of Belgrade, Faculty of Philosophy, Belgrade, Serbia                                                                                                              | ljiljana.lazarevic@f.bg.ac.rs       |
| Lisa M Jaremka                 | University of Delaware, Department of Psychological and Brain Sciences, Newark, United States                                                                                | ljaremka@udel.edu                   |
| Eline Suzanne Smit             | University of Amsterdam/ASCoR, Amsterdam, The Netherlands                                                                                                                    | E.S.Smit@uva.nl                     |
| Elizaveta Kushnir              | Independent Researcher                                                                                                                                                       | lizakushnir@yandex.ru               |
| Lisa J. Ferguson               | Northumbria University, Newcastle upon Tyne, United Kingdom                                                                                                                  | lisa2.ferguson@northumbria.ac.uk    |
| Lisa Anton-Boicuk              | University of Vienna, Social, Cognitive and Affective Neuroscience Unit, Department of Cognition, Emotion, and Methods in Psychology, Faculty of Psychology, Vienna, Austria | lisa.anton-boicuk@univie.ac.at      |
| Gabriel Lins de Holanda Coelho | University College Cork, Cork, Ireland                                                                                                                                       | linshc@gmail.com                    |
| Lina Ahlgren                   | Åbo Akademi University, Faculty of Arts, Psychology and Theology, Turku, Finland                                                                                             | lina.ahlgren@gmail.com              |
| Francesca Liga                 | Università di Messina, Dipartimento DIMED, Messina, Italy                                                                                                                    | ligaf@unime.it                      |
| Carmel A Levitan               | Occidental College, Department of Cognitive Science, Los Angeles, United States                                                                                              | levitan@oxy.edu                     |
| Leticia Micheli                | Julius-Maximilians Universität Würzburg, Institute of Psychology, Würzburg, Germany                                                                                          | leticia.micheli@uni-wuerzburg.de    |
| Lesley-Ann Gunton              | Northumbria University, Newcastle upon Tyne, United Kingdom                                                                                                                  | lesley-ann.gunton@northumbria.ac.uk |
| Leonhard Volz                  | University of Amsterdam, Amsterdam, Netherlands                                                                                                                              | leonhard.volz@gmail.com             |
| Marija Stojanovska             | PSA Psihesko, Skopje, North Macedonia                                                                                                                                        | lemarija22@gmail.com                |
| Leanne Boucher                 | Nova Southeastern University, Department of Psychology and Neuroscience, Fort Lauderdale, United States                                                                      | lb1079@nova.edu                     |

|                            |                                                                                                                                                                                |                                   |
|----------------------------|--------------------------------------------------------------------------------------------------------------------------------------------------------------------------------|-----------------------------------|
| Lara Samojlenko            | University of Primorska, Department of Psychology, Faculty of Mathematics, Natural Sciences and Information Technologies, Koper, Slovenia                                      | lara.samojlenko@gmail.com         |
| Lady Grey Javela Delgado   | Universidad del Rosario, Programa de Psicología, Bogotá, Colombia                                                                                                              | lady.javela@urosario.edu.co       |
| Lada Kaliska               | Matej Bel University, Department of Psychology, Faculty of Education, Banska Bystrica, Slovakia                                                                                | lada.kaliska@umb.sk               |
| Labadi Beatrix             | University of Pécs, Institute of Psychology, Pécs, Hungary                                                                                                                     | labadi.beatrix@pte.hu             |
| Lara Warmelink             | Lancaster University, Department of Psychology, Lancaster, United Kingdom                                                                                                      | l.warmelink@lancaster.ac.uk       |
| Luis Miguel Rojas-Berscia  | University of Queensland, School of Languages and Cultures, Brisbane, Australia<br>Pontificia Universidad Católica del Perú, Centro de Estudios Orientales, Lima, Peru         | lmrojasb@pucp.pe                  |
| Karen Yu                   | Sewanee: The University of the South, Department of Psychology, Sewanee, TN, United States                                                                                     | kyu@sewanee.edu                   |
| Keith Wylie                | Emporia State University, Department of Psychology, Emporia, Kansas, United States                                                                                             | kwylie@emporia.edu                |
| Jakub Wachowicz            | Independent Researcher                                                                                                                                                         | kubawachowicz7@gmail.com          |
| Kermeka Desai              | Indiana University of Pennsylvania, Indiana, United States                                                                                                                     | kermeka@gmail.com                 |
| Krystian Barzykowski       | Jagiellonian University, Institute of Psychology, Krakow, Poland                                                                                                               | krystian.barzykowski@uj.edu.pl    |
| Luca Kozma                 | University of Pécs, Institute of Psychology, Pécs, Hungary<br>University of the West of Scotland, School of Education and Social Sciences, Division of Psychology, Paisley, UK | luca.kozma@uws.ac.uk              |
| Kortnee Evans              | Murdoch University, College of Science, Health, Engineering and Education, Perth, Australia                                                                                    | kortnee.evans@education.wa.edu.au |
| Komila Kirgizova           | Independent Researcher                                                                                                                                                         | komila@hotmail.it                 |
| Bamikole B Emmanuel Agesin | Adekunle Ajasin University, Akungba Akoko, Ondo State, Nigeria                                                                                                                 | koleagesin@yahoo.com              |

|                          |                                                                                                                                                                                                                                                           |                               |
|--------------------------|-----------------------------------------------------------------------------------------------------------------------------------------------------------------------------------------------------------------------------------------------------------|-------------------------------|
| Monica A Koehn           | University of Canberra, Discipline of Psychology, Faculty of Health, Canberra, Australia                                                                                                                                                                  | koehn.monica@gmail.com        |
| Kelly Wolfe              | University of Edinburgh, Edinburgh, United Kingdom                                                                                                                                                                                                        | kwolfe@ed.ac.uk               |
| Tatiana Korobova         | London Gates Education Group, Moscow, Russia                                                                                                                                                                                                              | klushca@gmail.com             |
| Katherine Morris         | Willamette University, Salem, United States                                                                                                                                                                                                               | klmorris249@gmail.com         |
| Kristoffer Klevjer       | UiT The Arctic University of Norway, Department of Psychology, Tromsø, Norway                                                                                                                                                                             | klevjer@gmail.com             |
| Kevin van Schie          | Erasmus University Rotterdam, Department of Psychology, Education & Child Studies, Erasmus School of Social and Behavioural Sciences, Rotterdam, Netherlands<br>University of Cambridge, MRC Cognition and Brain Sciences Unit, Cambridge, United Kingdom | kevinvschie@gmail.com         |
| Kevin Vezirian           | University of Grenoble Alpes, Grenoble, France                                                                                                                                                                                                            | kevin.vezirian@gmail.com      |
| Kaja Damnjanović         | University of Belgrade, Faculty of Philosophy, Belgrade, Serbia                                                                                                                                                                                           | kdamnjan@f.bg.ac.rs           |
| Katrine Krabbe Thommesen | University of St Andrews, School of Psychology and Neuroscience, Zealand, Denmark                                                                                                                                                                         | katrinekrabbe@gmail.com       |
| Kathleen Schmidt         | Southern Illinois University, School of Psychological and Behavioral Sciences, Carbondale, IL United States                                                                                                                                               | kathleen.schmidt@siu.edu      |
| Katarzyna Filip          | Jagiellonian University, Institute of Psychology, Krakow, Poland                                                                                                                                                                                          | katarzyna.filip95@gmail.com   |
| Karolina Staniaszek      | Independent Researcher                                                                                                                                                                                                                                    | karolina.staniaszek@gmail.com |
| Karolina Grzech          | University of Valencia, Valencia, Spain<br>Stockholm University, Stockholm, Sweden                                                                                                                                                                        | szarota@gmail.com             |
| Karlijn Hoyer            | Tilburg University, Tilburg, Netherlands                                                                                                                                                                                                                  | karlijnhoyer@gmail.com        |
| Karis Moon               | Kingston University London, Department of Management, Kingston, United Kingdom                                                                                                                                                                            | Karisamoon@gmail.com          |

|                          |                                                                                                                                                                                                |                                   |
|--------------------------|------------------------------------------------------------------------------------------------------------------------------------------------------------------------------------------------|-----------------------------------|
| Sirikon Khaobunmasiri    | Suranaree University of Technology,<br>Nakhon Ratchasima, Thailand                                                                                                                             | kanjana@sut.ac.th                 |
| Kafeel Rana              | GC University, Lahore, Pakistan                                                                                                                                                                | kafeelrana87@gmail.com            |
| Kristina Janjić          | PSA Psihesko, Skopje, North<br>Macedonia                                                                                                                                                       | k.janjic@yahoo.com                |
| Jordan W Suchow          | Stevens Institute of Technology,<br>School of Business, Hoboken, United<br>States                                                                                                              | jws@stevens.edu                   |
| Julita Kiełińska         | Jagiellonian University, Institute of<br>Psychology, Krakow, Poland                                                                                                                            | julita.kielinska@alumni.uj.edu.pl |
| Julio E Cruz Vásquez     | Universidad de los Andes,<br>Department of Psychology Bogotá,<br>Colombia                                                                                                                      | julioeduardocruz@gmail.com        |
| Julien Chanal            | University of Geneva, Geneva,<br>Switzerland                                                                                                                                                   | julien.chanal@unige.ch            |
| Julia Beitner            | Goethe University Frankfurt,<br>Department of Psychology, Frankfurt<br>am Main, Germany                                                                                                        | beitner@psych.uni-frankfurt.de    |
| Juan Camilo Vargas-Nieto | Universidad de los Andes,<br>Department of Psychology, Bogotá,<br>Colombia                                                                                                                     | juanvargaspsicologia@gmail.com    |
| Jose Carlos T Roxas      | University of the Philippines Diliman,<br>Department of Psychology, Quezon<br>City, Philippines<br>De La Salle College of Saint Benilde,<br>Department of Psychology, Antipolo,<br>Philippines | jtroxas@up.edu.ph                 |
| Jennifer Taber           | Kent State University, Department of<br>Psychological Sciences, Kent, United<br>States                                                                                                         | jtaber1@kent.edu                  |
| Joan Urriago-Rayó        | Independent Researcher                                                                                                                                                                         | joan.urriago.rayo@gmail.com       |
| Jeffrey M. Pavlacić      | University of Mississippi, Department<br>of Psychology, Oxford, Mississippi,<br>United States                                                                                                  | jpavlaci@go.olemiss.edu           |
| Jozef Benka              | Pavol Jozef Šafárik University,<br>Košice, Slovakia                                                                                                                                            | jozef.benka@upjs.sk               |
| Jozef Bavolar            | Pavol Jozef Šafárik University in<br>Košice, Department of Psychology,<br>Faculty of Arts, Košice, Slovakia                                                                                    | jozef.bavolar@upjs.sk             |
| José A. Soto             | The Pennsylvania State University,<br>Department of Psychology, State<br>College, United States                                                                                                | josesoto@psu.edu                  |
| Jonas K Olofsson         | Stockholm University, Department of<br>Psychology, Stockholm, Sweden                                                                                                                           | jonas.olofsson@psychology.su.se   |



|                            |                                                                                                                                                                  |                                 |
|----------------------------|------------------------------------------------------------------------------------------------------------------------------------------------------------------|---------------------------------|
| Johannes K Vilsmeier       | University of Vienna, Department of Cognition, Emotion, and Methods in Psychology, Vienna, Austria                                                               | johannes.vilsmeier@univie.ac.at |
| Johanna Messerschmidt      | Leipzig University, Institute of Psychology, Leipzig, Germany                                                                                                    | johanna.messerschmidt@gmail.com |
| Johanna Czamanski-Cohen    | University of Haifa, School of Creative Arts Therapies, Haifa, Israel<br>University of Haifa, Emili Sagol Creative Arts Therapies Research Center, Haifa, Israel | joczamanski@gmail.com           |
| Joachim Waterschoot        | Ghent University, Department of Developmental, Personality and Social Psychology, Ghent, Belgium                                                                 | joachim.waterschoot@ugent.be    |
| Jennifer D. Moss           | Emporia State University, Department of Psychology, Emporia, Kansas, United States                                                                               | jmoss3@emporia.edu              |
| Jordane Boudesseul         | Universidad de Lima, Facultad de Psicología, Instituto de Investigación Científica, Lima, Peru                                                                   | jmj.boudesseul@gmail.com        |
| Jeong Min Lee              | Georgia State University, Department of Psychology, Atlanta, United States                                                                                       | jlee500@gsu.edu                 |
| Julia Kamburidis           | Sofia University St. Kliment Ohridski, Department of General, Experimental, Developmental, and Health Psychology, Sofia, Bulgaria                                | jkamburidis@gmail.com           |
| Jennifer A Joy-Gaba        | Virginia Commonwealth University, Richmond, United States                                                                                                        | jjoygaba@vcu.edu                |
| Janis Zickfeld             | Aarhus University, Department of Management, Aarhus, Denmark                                                                                                     | jhzickfeld@gmail.com            |
| Jacob F Miranda            | The University of Alabama, Tuscaloosa, Department of Psychology, Tuscaloosa, United States                                                                       | jfmiranda@crimson.ua.edu        |
| Jeroen P.H. Verharen       | University of California Berkeley, Department of Molecular and Cell Biology, Berkeley, United States                                                             | jeroenverharen@berkeley.edu     |
| Evgeniya Hristova          | New Bulgarian University, Cognitive Science and Psychology Department, Sofia, Bulgaria                                                                           | ehristova@cogs.nbu.bg           |
| Julie E Beshears           | University of Southern Indiana, Evansville, United States                                                                                                        | jeb1118@comcast.net             |
| Jasna Milosevic Djordjevic | Singidunum University, Faculty of Media and Communication, Belgrade, Serbia                                                                                      | jasna.milosevic@yahoo.com       |

|                             |                                                                                                                                                           |                                |
|-----------------------------|-----------------------------------------------------------------------------------------------------------------------------------------------------------|--------------------------------|
| Jasmijn Bosch               | University of Milan-Bicocca, Milan, Italy                                                                                                                 | Jasmijn.e.bosch@gmail.com      |
| Jaroslava Varella Valentova | University of São Paulo, Department of Experimental Psychology, Institute of Psychology, São Paulo, Brazil                                                | jaroslava@usp.br               |
| Jan Antfolk                 | Åbo Akademi University, Faculty of Arts, Psychology and Theology, Turku, Finland                                                                          | jantfolk@abo.fi                |
| Jana B. Berkessel           | University of Mannheim, Mannheim Centre for European Social Research, Mannheim, Germany                                                                   | jana.berkessel@uni-mannheim.de |
| Jana Schrötter              | Pavol Jozef Šafárik University in Košice, Košice, Slovakia                                                                                                | jana.schrotter@upjs.sk         |
| Jan Urban                   | Charles University, Environment Centre, Czechia                                                                                                           | jan.urban@czp.cuni.cz          |
| Jan Philipp Röer            | Witten/Herdecke University, Department of Psychology, Witten, Germany                                                                                     | jan.roeer@uni-wh.de            |
| James O Norton              | Murdoch University, College of Science, Health, Engineering & Education, Perth, Australia                                                                 | james.norton@murdoch.edu.au    |
| Jaime R Silva               | University of Desarrollo, Faculty of Psychology, Santiago, Chile<br>Clínica Alemana de Santiago, Chile<br>Sociedad Chilena de Desarrollo Emocional, Chile | jaimesilva@udd.cl              |
| Jade S Pickering            | University of Manchester, Division of Neuroscience and Experimental Psychology, Manchester, United Kingdom                                                | jadespickering@gmail.com       |
| Jáchym VINTR                | Charles University, Department of Psychology, Faculty of Arts, Prague, Czechia                                                                            | vintrj@student.cuni.cz         |
| Jim Uttley                  | University of Sheffield, School of Architecture, Sheffield, United Kingdom                                                                                | j.uttley@sheffield.ac.uk       |
| Jonas R Kunst               | University of Oslo, Department of Psychology, Oslo, Norway                                                                                                | j.r.kunst@psykologi.uio.no     |
| Izuchukwu L. G. Ndukaihe    | Alex Ekwueme Federal University, Department of Psychology, Ndufu-Alike, Nigeria.                                                                          | izumario@yahoo.co.uk           |
| Aishwarya Iyer              | Sampurna Montfort College, Bangalore, India                                                                                                               | iyeraishwarya.work@gmail.com   |

|                           |                                                                                                                                                                                                                     |                                   |
|---------------------------|---------------------------------------------------------------------------------------------------------------------------------------------------------------------------------------------------------------------|-----------------------------------|
| Iris Vilares              | University of Minnesota, Twin Cities,<br>Department of Psychology,<br>Minneapolis, United States                                                                                                                    | ivilares@umn.edu                  |
| Aleksandr Ivanov          | HSE University, Moscow, Russia                                                                                                                                                                                      | ivansash21112@mail.ru             |
| Ivan Ropovik              | Charles University, Faculty of<br>Education, Institute for Research and<br>Development of Education, Prague,<br>Czechia<br>University of Presov, Faculty of<br>Education, Presov, Slovakia                          | ivan.ropovik@gmail.com            |
| Isabela Sula              | Independent Researcher                                                                                                                                                                                              | isabela.sula1997@gmail.com        |
| Irena Sarieva             | HSE University, Moscow, Russia                                                                                                                                                                                      | isarieva@hse.ru                   |
| Irem Metin-Orta           | Atilim University, Department of<br>Psychology, Ankara, Turkey                                                                                                                                                      | irem.metin@atilim.edu.tr          |
| Irina Prusova             | HSE University, Moscow, Russia                                                                                                                                                                                      | iprusova@hse.ru                   |
| Isabel Pinto              | University of Porto, Center for<br>Psychology at University of Porto,<br>Porto, Portugal                                                                                                                            | ipinto@fpce.up.pt                 |
| Andreea Ioana Bozdoc      | Lucian Blaga University of Sibiu,<br>Department of Psychology, Sibiu,<br>Romania                                                                                                                                    | ioanabozdoc@gmail.com             |
| Inês A. T. Almeida        | University of Coimbra, Faculty of<br>Medicine FMUC, Institute of Nuclear<br>Sciences Applied to Health ICNAS,<br>Coimbra Institute for Biomedical<br>Imaging and Translational Research<br>CIBIT, Coimbra, Portugal | italmeida@fmed.uc.pt              |
| Ilse L. Pit               | University of Oxford, Institute of<br>Human Sciences, Oxford, United<br>Kingdom<br>Magdalen College, Calleva Research<br>Centre for Evolution and Human<br>Sciences, Oxford, United Kingdom                         | ilse.pit@anthro.ox.ac.uk          |
| Ilker Dalgac              | Ankara Medipol University,<br>Department of Psychology, Ankara,<br>Turkey                                                                                                                                           | ilker.dalgac@ankaramedipol.edu.tr |
| Ilya Zakharov             | Psychological Institute of the Russian<br>Academy of Education,<br>Developmental Behavioral Genetics<br>Laboratory, Moscow, Russia, Russia                                                                          | iliazaharov@gmail.com             |
| Azuka Ikechukwu<br>Arinze | Alex Ekwueme Federal University,<br>Ndufu-Alike, Nigeria                                                                                                                                                            | ikeazukaarinze@gmail.com          |
| Keiko Ihaya               | Fukuoka Institute of Technology,<br>Center for Liberal Arts, Fukuoka,<br>Japan                                                                                                                                      | ihayakk@gmail.com                 |

|                            |                                                                                                                                                                                      |                                        |
|----------------------------|--------------------------------------------------------------------------------------------------------------------------------------------------------------------------------------|----------------------------------------|
| Ian D Stephen              | Nottingham Trent University,<br>Division of Psychology, Nottingham,<br>UK                                                                                                            | ian.stephen@ntu.ac.uk                  |
| Biljana Gjoneska           | Macedonian Academy of Sciences<br>and Arts, Skopje, North Macedonia                                                                                                                  | biljanagjoneska@manu.edu.mk            |
| Hilmar Brohmer             | University of Graz, Institute of<br>Psychology, Graz, Austria                                                                                                                        | hilmar.brohmer@uni-graz.at             |
| Heather Flowe              | University of Birmingham, School of<br>Psychology, Birmingham, United<br>Kingdom                                                                                                     | h.flowe@bham.ac.uk                     |
| Hendrik Godbersen          | FOM University of Applied Sciences,<br>Essen, Germany                                                                                                                                | hendrik.godbersen@godbersen.onl<br>ine |
| Halil Emre Kocalar         | Muğla Sıtkı Koçman University,<br>Department of Psychological<br>Counseling and Guidance, Muğla,<br>Turkey                                                                           | hemrekocalar@mu.edu.tr                 |
| Mattie V Hedgebeth         | Virginia Commonwealth University,<br>Richmond, United States                                                                                                                         | hedgebethm@vcu.edu                     |
| Hu Chuan-Peng              | Nanjing Normal University, School<br>of Psychology, Nanjing, China                                                                                                                   | hcp4715@gmail.com                      |
| MohammadHasan<br>Sharifian | University of Tehran, Department of<br>Psychology, Tehran, Iran                                                                                                                      | hasan.sharifian@ut.ac.ir               |
| Harry Manley               | Chulalongkorn University, Faculty of<br>Psychology, , Bangkok, Thailand                                                                                                              | harrisonmanley@gmail.com               |
| Handan Akkas               | Ankara Science University, Business<br>Administration Department, Ankara,<br>Turkey                                                                                                  | handan.akkas@hotmail.com               |
| Nandor Hajdu               | ELTE Eötvös Lóránd University,<br>Institute of Psychology, Budapest,<br>Hungary                                                                                                      | hajdu.nandor93@gmail.com               |
| Habiba Azab                | Baylor College of Medicine,<br>Department of Neurosurgery,<br>Houston, United States                                                                                                 | habiba.azab@gmail.com                  |
| Gwenael Kaminski           | Université de Toulouse, CLLE,<br>CNRS, UT2J, Toulouse, France                                                                                                                        | gwenael.kaminski@univ-tlse2.fr         |
| Gustav Nilsson             | Karolinska Institutet, Department of<br>Clinical Neuroscience, Solna, Sweden<br>Stockholm University, Department of<br>Psychology, Stockholm, Sweden                                 | gustav.nilsson@ki.se                   |
| Gulnaz Anjum               | Simon Fraser University, Department<br>of Psychology, Burnaby, Canada<br>Institute of Business Administration,<br>Department of Social Sciences &<br>Liberal Arts, Karachi, Pakistan | ganjum@sfu.ca                          |

|                         |                                                                                                                                                  |                                |
|-------------------------|--------------------------------------------------------------------------------------------------------------------------------------------------|--------------------------------|
| Giovanni A. Travaglino  | Royal Holloway, University of London, Department of Law and Criminology, Egham, United Kingdom                                                   | giovanni.travaglino@rhul.ac.uk |
| Gilad Feldman           | University of Hong Kong, Hong Kong, SAR China                                                                                                    | giladfel@gmail.com             |
| Gerit Pfuhl             | UiT The Arctic University of Norway, Department of Psychology, Tromsø, Norway                                                                    | gerit.pfuhl@uit.no             |
| Gabriela Czarnek        | Jagiellonian University, Institute of Psychology, Krakow, Poland                                                                                 | gabriela.czarnek@uj.edu.pl     |
| Gabriela Mariana Marcu  | Lucian Blaga University of Sibiu, Department of Psychology, Sibiu Romania<br>Carol Davila University of Medicine and Pharmacy Bucharest, Romania | gabriela.marcu@ulbsibiu.ro     |
| Gabriela Hofer          | University of Graz, Institute of Psychology, Graz, Austria                                                                                       | gabriela.hofer@uni-graz.at     |
| Gabriel Banik           | University of Presov, Institute of Psychology, Presov, Slovakia                                                                                  | gabriel.banik@gmail.com        |
| Gabriel Agboola Adetula | Adekunle Ajasin University, Department of Pure and Applied Psychology, Faculty of Social and Management Sciences, Akungba Akoko, Nigeria         | g1b2gbo3detul4@gmail.com       |
| Gijsbert Bijlstra       | Radboud University, Behavioural Science Institute, Nijmegen, Netherlands                                                                         | g.bijlstra@bsi.ru.nl           |
| Frederick Verbruggen    | Ghent University, Department of Experimental Psychology, Ghent, Belgium                                                                          | frederick.verbruggen@ugent.be  |
| Franki Y. H. Kung       | Purdue University, West Lafayette, United States                                                                                                 | frankikung@purdue.edu          |
| Frank Martela           | Aalto University, Espoo, Finland                                                                                                                 | frank.martela@aalto.fi         |
| Francesco Foroni        | Australian Catholic University, Sydney, Australia                                                                                                | francesco.foroni@acu.edu.au    |
| Jacques Forest          | Université du Québec à Montréal, School of Management, Montreal, Canada                                                                          | forest.jacques@uqam.ca         |
| Gage Singer             | Indiana University of Pennsylvania, Department of Psychology, Indiana, United States                                                             | gagesinger@live.com            |

|                           |                                                                                                                                   |                                  |
|---------------------------|-----------------------------------------------------------------------------------------------------------------------------------|----------------------------------|
| Fany Muchembled           | Instituto Tecnológico de Estudios Superiores de Monterrey, Monterrey, Mexico                                                      | fany.muchembled@tec.mx           |
| Flavio Azevedo            | Friedrich Schiller University Jena, Jena, Germany                                                                                 | flavio.azevedo@uni-jena.de       |
| Farnaz Mosannenzadeh      | Radboud University, Faculty of Social Sciences, Behavioural Science Institute, Nijmegen, Netherlands                              | farnaz.mosannenzadeh@ru.nl       |
| Evelina Marinova          | Sofia University St. Kliment Ohridski, Department of General, Experimental, Developmental, and Health Psychology, Sofia, Bulgaria | evelina.b.marinova@gmail.com     |
| Eva Štrukelj              | Sapienza University of Rome, Dynamic and Clinical Psychology, Rome, Italy                                                         | eva.strukelj2@gmail.com          |
| Zahra Etebari             | Ferdowsi University of Mashhad, Mashhad, Iran                                                                                     | etebari.zahra@gmail.com          |
| Emma L. Bradshaw          | Australian Catholic University, Institute for Positive Psychology and Education, Sydney, Australia                                | emma.bradshaw@acu.edu.au         |
| Ernest Baskin             | Saint Joseph's University, Philadelphia, United States                                                                            | ebaskin@sju.edu                  |
| Elkin Oswaldo Luis Garcia | Universidad de Navarra, Pamplona, Spain                                                                                           | eoswaldo@unav.es                 |
| Erica Musser              | Florida International University, Department of Psychology, Center for Children and Families, Miami, United States                | emusser@fiu.edu                  |
| I.M.M. van Steenkiste     | Universiteit Leiden, Leiden, Netherlands                                                                                          | imvsteenkiste@gmail.com          |
| El Rim Ahn                | University of Florida, Department of Psychology, Gainesville, United States                                                       | elrimahn@ufl.edu                 |
| Eleanor Quested           | Curtin University, enAble Institute, Perth, Australia                                                                             | eleanor.quested@curtin.edu.au    |
| Ekaterina Pronizius       | University of Vienna, Department of Cognition, Emotion, and Methods in Psychology, Faculty of Psychology, Vienna, Austria         | ekaterina.pronizius@univie.ac.at |
| Emily A Jackson           | Indiana University of Pennsylvania, Indiana, United States                                                                        | ejackson@iup.edu                 |
| Ef시오 Manunta              | Université de Toulouse, CLLE, CNRS, UT2J, Toulouse, France                                                                        | efisio.manunta@univ-tlse2.fr     |

|                    |                                                                                                                            |                           |
|--------------------|----------------------------------------------------------------------------------------------------------------------------|---------------------------|
| Elena Agadullina   | HSE University, School of Psychology, Moscow, Russia                                                                       | eagadullina@hse.ru        |
| Dušana Šakan       | Union University, Faculty of Legal and Business Studies Dr Lazar Vrkatic, Department of Psychology, Novi Sad, Serbia       | dusana.sakan@flv.edu.rs   |
| Pinar Dursun       | Afyon Kocatepe University, Department of Psychology, Afyonkarahisar, Turkey                                                | dursun.pinar@gmail.com    |
| Olivier Dujols     | University of Grenoble Alpes, Grenoble, France                                                                             | dujols.ol@gmail.com       |
| Dmitrii Dubrov     | National Research University Higher School of Economics, RF                                                                | ddubrov@hse.ru            |
| Megan Willis       | Australian Catholic University, School of Behavioural and Health Sciences, Sydney, Australia                               | Dr.Megan.Willis@gmail.com |
| Murat Tümer        | Hacettepe University, Department of Anesthesiology and Reanimation, Ankara, Turkey                                         | m.tumer@hacettepe.edu.tr  |
| Jennifer L Beaudry | Swinburne University of Technology, Department of Psychological Sciences, Melbourne, Australia                             | jbeaudry@swin.edu.au      |
| Dora Popović       | Institute of Social Sciences Ivo Pilar, Zagreb, Croatia                                                                    | dora.popovic@pilar.hr     |
| Daniel Dunleavy    | Florida State University, Center for Translational Behavioral Science, Tallahassee, United States                          | djd09e@fsu.edu            |
| Ikhlas Djamai      | Mohammed V University in Rabat, Rabat, Morocco                                                                             | djamaiikhlas@gmail.com    |
| Dino Krupić        | The University of Osijek, Faculty of Humanities and Social Science, Osijek, Croatia                                        | dkrupic@ffos.hr           |
| Dora Herrera       | Pontifical Catholic University of Peru, Lima, Peru                                                                         | diherrer@pucp.pe          |
| Diego Vega         | Universidad Latina de Costa Rica, San Pedro, Costa Rica                                                                    | luis.veгаа@ulatina.cr     |
| Hongfei Du         | Beijing Normal University at Zhuhai, Institute of Advanced Studies in Humanities and Social Sciences, Zhuhai, China        | dhfpsy@gmail.com          |
| Débora Mola        | Universidad Nacional de Córdoba (UNC), Facultad de Psicología; Instituto de Investigaciones Psicológicas (IIPsi) - Consejo | debora.mola@unc.edu.ar    |

|                          |                                                                                                                                                                                         |                                      |
|--------------------------|-----------------------------------------------------------------------------------------------------------------------------------------------------------------------------------------|--------------------------------------|
|                          | Nacional de Investigaciones Científicas y Técnicas (CONICET) - UNC, Córdoba, Argentina                                                                                                  |                                      |
| Desislava Chakarova      | New Bulgarian University, Sofia, Bulgaria                                                                                                                                               | de.chakarova@gmail.com               |
| William E Davis          | Wittenberg University, Department of Psychology, Springfield, United States                                                                                                             | davisw4@wittenberg.edu               |
| Dawn Liu Holford         | University of Essex, Essex, United Kingdom                                                                                                                                              | dawn.liuholford@gmail.com            |
| David M. G. Lewis        | Murdoch University, College of Science, Health, Engineering and Education, Perth, Australia; Murdoch University, Centre for Healthy Ageing, Health Futures Institute, Perth, Australia, | davidlewis@utexas.edu                |
| David C. Vaidis          | Université de Paris, Paris, France                                                                                                                                                      | david.vaidis@u-paris.fr              |
| Daphna Hausman Ozery     | California State University, Northridge, United States                                                                                                                                  | daphna.ozery@csun.edu                |
| Danilo Zambrano Ricaurte | Fundación Universitaria Konrad Lorenz, Faculty of Psychology, Bogotá, Colombia                                                                                                          | danilo.zambranor@konradlorenz.edu.co |
| Daniel Storage           | University of Denver, Department of Psychology, Denver, United States                                                                                                                   | Daniel.Storage@du.edu                |
| Daniela Sousa            | University of Coimbra, Institute of Nuclear Sciences Applied to Health ICNAS, Coimbra Institute for Biomedical Imaging and Translational Research CIBIT, Coimbra, Portugal              | daniela.d.sousa@uc.pt                |
| Daniela Serrato Alvarez  | Fundación Universitaria Konrad Lorenz, Bogotá, Colombia                                                                                                                                 | daniela.serratoa@konradlorenz.edu.co |
| Daniel Boller            | University of St. Gallen, St. Gallen, Switzerland                                                                                                                                       | daniel.boller@unisg.ch               |
| Anna Dalla Rosa          | University of Padova, Department of Philosophy, Sociology, Education and Applied Psychology, Padua, Italy                                                                               | anna.dallarosa@unipd.it              |
| Daliborka Dimova         | PSA Psihesko, Skopje, North Macedonia                                                                                                                                                   | daliborkadimova@gmail.com            |
| Dajana Krupić            | Norvel - Psychological Centre for Counselling and Research, Croatia                                                                                                                     | dajana.krupic@norvel.hr              |
| Dafne Marko              | University of Ljubljana, Cognitive Science, Faculty of Education, Ljubljana, Slovenia                                                                                                   | dafne.marko@gmail.com                |



|                         |                                                                                                                           |                                   |
|-------------------------|---------------------------------------------------------------------------------------------------------------------------|-----------------------------------|
| David Moreau            | The University of Auckland, School of Psychology and Centre for Brain Research, Auckland, New Zealand                     | d.moreau@auckland.ac.nz           |
| Crystal Reeck           | Temple University, Fox School of Business, Philadelphia, United States                                                    | crystalreeck@gmail.com            |
| Rita C Correia          | University of Porto, Center for Psychology at University of Porto, Porto, Portugal                                        | correia.rita.27@gmail.com         |
| Cassie M Whitt          | University of Alabama, Tuscaloosa, United States                                                                          | cassiewhitt9@gmail.com            |
| Claus Lamm              | University of Vienna, Department of Cognition, Emotion, and Methods in Psychology, Faculty of Psychology, Vienna, Austria | claus.lamm@univie.ac.at           |
| Claudio Singh Solorzano | Sapienza University, Department of Psychology, Rome, Italy                                                                | claudio.singh@uniroma1.it         |
| Claudia C von Bastian   | University of Sheffield, Department of Psychology, Sheffield, United Kingdom                                              | c.c.vonbastian@sheffield.ac.uk    |
| Clare AM Sutherland     | University of Aberdeen, School of Psychology, King's College, Aberdeen, Scotland                                          | clare.sutherland@abdn.ac.uk       |
|                         | University of Western Australia, School of Psychological Science, Perth, Australia                                        |                                   |
| Clara Overkott          | University of Zurich, Department of Psychology, Zurich, Switzerland                                                       | c.overkott@psychologie.uzh.ch     |
| Christopher L. Aberson  | California Polytechnic University, Humboldt, Arcata, United States                                                        | cla18@humboldt.edu                |
| Chunhui Wang            | Chinese Center of Disease Prevention and Control, China                                                                   | chunhui.wang.qdjk@gmail.com       |
| Christopher P. Niemiec  | University of Rochester, Rochester, United States                                                                         | christopher.niemiec@rochester.edu |
| Christiana Karashiali   | University of Cyprus, Department of Psychology, Nicosia, Cyprus                                                           | karashiali.christiana@ucy.ac.cy   |
| Chris Noone             | National University of Ireland Galway, School of Psychology, Galway, Ireland                                              | chris.noone@nuigalway.ie          |
| Faith Chiu              | University of Essex, Department of Language and Linguistics, Essex, United Kingdom                                        | f.chiu@essex.ac.uk                |
| Chiara Picciocchi       | University of Naples L'Orientale, Naples, Italy                                                                           | chiara.picciocchi@outlook.com     |

|                     |                                                                                                                                                                                                                                                                                                 |                               |
|---------------------|-------------------------------------------------------------------------------------------------------------------------------------------------------------------------------------------------------------------------------------------------------------------------------------------------|-------------------------------|
| Charlotte Brownlow  | University of Southern Queensland,<br>Toowoomba, Australia                                                                                                                                                                                                                                      | Charlotte.brownlow@usq.edu.au |
| Cemre Karaarslan    | University of Başkent, Institute of<br>Social Sciences, Department of<br>Psychology, Ankara, Turkey                                                                                                                                                                                             | cemrekaraarslann@gmail.com    |
| Nicola Cellini      | University of Padua, Department of<br>General Psychology, Padua, Italy<br>University of Padua, Department of<br>Biomedical Sciences, Padua, Italy<br>University of Padua, Padova<br>Neuroscience Center, Padua, Italy<br>University of Padua, Human Inspired<br>Technology Center, Padua, Italy | nicola.cellini@unipd.it       |
| Celia Esteban-Serna | University College London, Division<br>of Psychology & Language Sciences,<br>London, United Kingdom                                                                                                                                                                                             | celiaestser99@gmail.com       |
| Cecilia Reyna       | Universidad Nacional de Córdoba<br>(UNC), Facultad de Psicología;<br>Instituto de Investigaciones<br>Psicológicas (IIPsi) - Consejo<br>Nacional de Investigaciones<br>Científicas y Técnicas (CONICET) -<br>UNC, Córdoba, Argentina                                                             | ceciliareyna@unc.edu.ar       |
| Cecilia Ferreyra    | Pontificia Universidad Católica del<br>Peru, Lima, Peru                                                                                                                                                                                                                                         | cecilia.ferreyra@pucp.pe      |
| Carlota Batres      | Franklin and Marshall College,<br>Department of Psychology,<br>Lancaster, United States                                                                                                                                                                                                         | cbatres@fandm.edu             |
| Ranran Li           | Vrije Universiteit Amsterdam,<br>Department of Experimental and<br>Applied Psychology, Amsterdam,<br>Netherlands                                                                                                                                                                                | ranran.li@vu.nl               |
| Caterina Grano      | Sapienza University, Department of<br>Psychology, Rome, Italy                                                                                                                                                                                                                                   | caterina.grano@uniroma1.it    |
| Joelle Carpentier   | Université du Québec à Montréal,<br>School of Management, Department<br>of Organization and Human<br>Resources, Montreal, Canada                                                                                                                                                                | carpentier.joelle@uqam.ca     |
| Christian K. Tamnes | University of Oslo, Department of<br>Psychology, Oslo, Norway                                                                                                                                                                                                                                   | c.k.tamnes@psykologi.uio.no   |
| Cynthia H.Y. Fu     | University of East London, School of<br>Psychology, London, United<br>Kingdom<br>King's College London, Centre for<br>Affective Disorders, Institute of<br>Psychiatry, Psychology and<br>Neuroscience, London, United<br>Kingdom                                                                | c.fu@uel.ac.uk                |

|                    |                                                                                                                                                                                                                          |                         |
|--------------------|--------------------------------------------------------------------------------------------------------------------------------------------------------------------------------------------------------------------------|-------------------------|
| Byurakn Ishkhanyan | Aarhus University, School of Communication and Culture, Aarhus, Denmark                                                                                                                                                  | byurakn@cc.au.dk        |
| Lisa Bylinina      | Leiden University, Leiden, Netherlands                                                                                                                                                                                   | bylinina@gmail.com      |
| Bastian Jaeger     | Vrije Universiteit Amsterdam, Department of Experimental and Applied Psychology, Amsterdam, Netherlands<br>Tilburg University, Department of Social Psychology, Tilburg, Netherlands                                     | bxjaeger@gmail.com      |
| Carsten Bundt      | Multimodal Imaging and Cognitive Control Lab, Department of Psychology, University of Oslo, Oslo, Norway<br>Cognitive and Translational Neuroscience Cluster, Department of Psychology, University of Oslo, Oslo, Norway | bundt.carsten@gmail.com |
| Tara Bulut Allred  | University of Belgrade, Faculty of Philosophy, Laboratory for Research of Individual Differences, Belgrade, Serbia                                                                                                       | tara.bulut@f.bg.ac.rs   |
| Branko J. Vermote  | Ghent University, Department of Developmental, Personality and Social Psychology, Ghent, Belgium                                                                                                                         | branko.vermote@ugent.be |
| Ahmed Bokkour      | Mohammed V University in Rabat, Rabat, Morocco                                                                                                                                                                           | bokkour.ahmed@gmail.com |
| Natalia Bogatyreva | HSE University, Moscow, Russia                                                                                                                                                                                           | nbogatyreva@hse.ru      |
| Jiaxin Shi         | The University of Hong Kong, Hong Kong, SAR China                                                                                                                                                                        | langlang723@foxmail.com |
| William J Chopik   | Michigan State University, Department of Psychology, East Lansing, United States                                                                                                                                         | bill.chopik@gmail.com   |
| Benedict Antazo    | Jose Rizal University, Department of Psychology, Mandaluyong, Philippines                                                                                                                                                | bgantazo@gmail.com      |
| Behzad Behzadnia   | University of Tabriz, <i>Faculty of Physical Education and Sport Science</i> , Department of Motor Behavior, Tabriz, Iran                                                                                                | behzadniaa@gmail.com    |
| Maja Becker        | Université de Toulouse, CLLE, CNRS, Toulouse, France                                                                                                                                                                     | mbecker@univ-tlse2.fr   |
| Manal M. Bayyat    | School of Sport Science, University of Jordan, Jordan                                                                                                                                                                    | Mabayyat@yahoo.com      |

|                          |                                                                                                                                  |                            |
|--------------------------|----------------------------------------------------------------------------------------------------------------------------------|----------------------------|
| Beatrice Cocco           | Independent Researcher                                                                                                           | beatricecocco094@gmail.com |
| Wei-Lun Chou             | Fo Guang University, Department of Psychology, Jiaoxi, Taiwan                                                                    | chouweilun@ntu.edu.tw      |
| Vassilis Barkoukis       | Department of Physical Education and Sport Science, Aristotle University of Thessaloniki, Greece                                 | bark@phed.auth.gr          |
| Barbora Hubena           | Independent Researcher                                                                                                           | barbora.hubena@gmail.com   |
| Barbara Žuro             | The Institute of Psychology, Dublin, Ireland<br>University of Osijek, Faculty of Humanities and Social Sciences, Osijek, Croatia | barbara.zuro1@gmail.com    |
| Balazs Aczel             | ELTE Eötvös Loránd University, Institute of Psychology, Budapest, Hungary                                                        | balazs.aczel@gmail.com     |
| Ekaterina Baklanova      | Lomonosov Moscow State University, Institute of Asian and African Studies, Moscow, Russia                                        | baklanova@gmail.com        |
| Hui Bai                  | Stanford University, Palo Alto, United States                                                                                    | huibai@stanford.edu        |
| Busra Bahar Balci        | Samsun University, Department of Psychology, Samsun, Turkey<br>Dokuz Eylül University, Department of Psychology, Izmir, Turkey   | baharbalci2@gmail.com      |
| Peter Babinčák           | University of Presov, Faculty of Arts, Institute and Psychology, Presov, Slovakia                                                | peter.babincak@unipo.sk    |
| Bart Soenens             | Department of Developmental, Personality and Social Psychology, Ghent University                                                 | Bart.Soenens@ugent.be      |
| Barnaby James Wyld Dixon | University of the Sunshine Coast, School of Health and Behavioural Sciences, Sippy Downs, Australia                              | bdixon@usc.edu.au          |
| Aviv Mokady              | Ben Gurion University, Department of Psychology, Beersheba, Israel                                                               | avmokady@gmail.com         |
| Heather Barry Kappes     | London School of Economics and Political Science, Department of Management, London, United Kingdom                               | h.kappes@lse.ac.uk         |
| Mohammad Atari           | University of Southern California, Department of Psychology, Los Angeles, United States                                          | atari@usc.edu              |
| Anna Szala               | Oakland University, Department of Psychology, Rochester, United States                                                           | aszala88@gmail.com         |

|                         |                                                                                                                                                                      |                                 |
|-------------------------|----------------------------------------------------------------------------------------------------------------------------------------------------------------------|---------------------------------|
| Anna Szabelska          | Queen's University Belfast, Belfast, Ireland                                                                                                                         | szabelska.anna@gmail.com        |
| John Jamir Benzon Aruta | De La Salle University, Manila, Philippines                                                                                                                          | aruta_johnjamirbenzon@yahoo.com |
| Artur Domurat           | Kozminski University, Centre for Economic Psychology and Decision Sciences, Warsaw, Poland                                                                           | adomurat@kozminski.edu.pl       |
| Nwadiogo Chisom Arinze  | Alex Ekwueme Federal University Ndufu-Alike, Nigeria                                                                                                                 | arinzenwadiogo@gmail.com        |
| Arianna Modena          | Università degli Studi di Trieste, Dipartimento di Scienze Giuridiche, del Linguaggio, dell'Interpretazione e della Traduzione, Trieste, Italy                       | ariannamodena95@gmail.com       |
| Arca Adiguzel           | Muğla Sıtkı Koçman University, Department of Psychological Counseling and Guidance, Muğla, Turkey                                                                    | arcaadiguzel@mu.edu.tr          |
| Arash Monajem           | University of Tehran, Tehran, Iran                                                                                                                                   | arash.monajem@hotmail.com       |
| Kanza AIT EL ARABI      | Mohammed V University of Rabat, Rabat, Morocco                                                                                                                       | arabikanza@gmail.com            |
| Asil Ali Özdoğru        | Üsküdar University, Department of Psychology, İstanbul, Turkey                                                                                                       | asil.ozdogru@uskudar.edu.tr     |
| Alex O. Rothbaum        | Case Western Reserve University, Cleveland, United States                                                                                                            | aor13@case.edu                  |
| Adriana Olaya Torres    | University of Desarrollo, Faculty of Psychology, Santiago, Chile                                                                                                     | aolayat@udd.cl                  |
| Andriana Theodoropoulou | University of Essex, Department of Psychology, Essex, United Kingdom                                                                                                 | a.theodoropoulou@essex.ac.uk    |
| Anna Skowronek          | Independent Researcher                                                                                                                                               | anna.allodola@gmail.com         |
| Anita Penić Jurković    | Kindergarten Kustošija, Zagreb, Croatia                                                                                                                              | anita.penic.vk@gmail.com        |
| Anisha Singh            | Busara Center of Behavioural Economics, Kenya                                                                                                                        | anisha.singh@busaracenter.org   |
| Angelos P. Kassianos    | Cyprus University of Technology, Department of Nursing, Limassol, Cyprus<br>University College London, Department of Applied Health Research, London, United Kingdom | angelos.kassianos@cut.ac.cy     |
| Andrej Findor           | Comenius University in Bratislava, Faculty of Social and Economic Sciences, Bratislava, Slovakia                                                                     | andrej.findor@fses.uniba.sk     |
| Javad Hatami            | University of Tehran                                                                                                                                                 | hatamijm@ut.ac.ir               |

|                               |                                                                                                                                                                                                                                                                                                                |                                         |
|-------------------------------|----------------------------------------------------------------------------------------------------------------------------------------------------------------------------------------------------------------------------------------------------------------------------------------------------------------|-----------------------------------------|
| Andree Hartanto               | Singapore Management University,<br>School of Social Sciences, Singapore                                                                                                                                                                                                                                       | andreeh@smu.edu.sg                      |
| Anais Thibault Landry         | Concordia University, John Molson<br>Business School, Montreal, Canada                                                                                                                                                                                                                                         | Anais.thibaultlandry@gmail.com          |
| Ana Ferreira                  | University of Coimbra, Faculty of<br>Medicine FMUC, Institute of Nuclear<br>Sciences Applied to Health ICNAS,<br>Coimbra Institute for Biomedical<br>Imaging and Translational Research<br>CIBIT, Coimbra, Portugal                                                                                            | apferreira@icnas.uc.pt                  |
| Anabela Caetano<br>Santos     | University of Lisbon, Aventura Social<br>and DESSH, Faculty of Human<br>Kinetics,, Lisbon, Portugal<br>University of Lisbon, Institute of<br>Environmental Health, Medicine<br>Faculty, Lisbon, Portugal<br>Universitário de Lisboa, Iscte-<br>Instituto Universitário de Lisboa,<br>CIS-IUL, Lisbon, Portugal | anabelasantos@campus.ul.pt              |
| Anabel De la Rosa-<br>Gomez   | National Autonomous University of<br>Mexico, Faculty of Higher Studies<br>Iztacala, Mexico City, Mexico                                                                                                                                                                                                        | anabel.delarosa@iztacala.unam.mx        |
| Amélie Gourdon-<br>Kanhukamwe | Kingston University, London, United<br>Kingdom<br>King's College London, London,<br>United Kingdom<br>Institute for Globally Distributed<br>Open Research and Education<br>(IGDORE), United Kingdom                                                                                                            | amelie.gourdon-<br>kanhukamwe@kcl.ac.uk |
| Alexandria M. Luxon           | Illinois Institute of Technology,<br>Chicago, United States                                                                                                                                                                                                                                                    | aluxon@hawk.iit.edu                     |
| Anna Louise Todsen            | University of St Andrews,<br>Department of Psychology and<br>Neuroscience, St Andrews, United<br>Kingdom                                                                                                                                                                                                       | alt8@st-andrews.ac.uk                   |
| Alper Karababa                | Muğla Sıtkı Koçman University,<br>Department of Psychological<br>Counselling and Guidance, Faculty of<br>Education, Muğla, Turkey                                                                                                                                                                              | alperkarababa@mu.edu.tr                 |
| Allison Janak                 | New York University, Steinhardt,<br>Department of Applied Psychology,<br>New York, United States                                                                                                                                                                                                               | apj263@nyu.edu                          |
| Alice Pilato                  | University of Trieste, Department of<br>Translation and Interpretation,<br>Trieste, Italy                                                                                                                                                                                                                      | alicepilato98@gmail.com                 |
| Alexandre Bran                | Université de Paris, Paris, France                                                                                                                                                                                                                                                                             | alexandre.bran@outlook.com              |

|                        |                                                                                                                                                                                                                   |                              |
|------------------------|-------------------------------------------------------------------------------------------------------------------------------------------------------------------------------------------------------------------|------------------------------|
| Alexa M Tullett        | University of Alabama, Department of Psychology, Tuscaloosa, United States                                                                                                                                        | alexa.tullett@gmail.com      |
| Anna O. Kuzminska      | University of Warsaw, Faculty of Management, Warsaw, Poland                                                                                                                                                       | akuzminska@wz.uw.edu.pl      |
| Anthony J Krafnick     | Dominican University, Department of Psychology, River Forest, United States                                                                                                                                       | akrafnick@dom.edu            |
| Anum Urooj             | La Trobe University, Melbourne, Australia                                                                                                                                                                         | ain.sonia@gmail.com          |
| Ahmed Khaoudi          | Mohammed V University in Rabat, Rabat, Morocco                                                                                                                                                                    | ahmedkhaoudi@gmail.com       |
| Afroja Ahmed           | University of Limerick, Global MINDS, Department of Psychology, Limerick, Ireland                                                                                                                                 | ahmedafroja25@gmail.com      |
| Agata Groyecka-Bernard | University of Wroclaw, Institute of Psychology, Wroclaw, Poland<br>Johannes Gutenberg University, Social and Legal Psychology, Mainz, Germany                                                                     | agata.groyecka@gmail.com     |
| Adrian Dahl Askelund   | Nic Waals Institute, Lovisenberg Diaconal Hospital, Oslo, Norway                                                                                                                                                  | adrian.askelund@gmail.com    |
| Adeyemi Adetula        | Université Grenoble Alpes, LIP/PC2S, Grenoble, France<br>Alex Ekwueme Federal University, Department of Psychology, Ndufu-Alike, Nigeria                                                                          | adeyemiadetula1@gmail.com    |
| Anabel Belaus          | Universidad Nacional de Córdoba (UNC), Facultad de Psicología; Instituto de Investigaciones Psicológicas (IIPsi) - Consejo Nacional de Investigaciones Científicas y Técnicas (CONICET) - UNC, Córdoba, Argentina | abelaus@unc.edu.ar           |
| Abdelilah Charyate     | Ibn Tofail University, Higher College of Education & Training<br>Kenitra, Morocco                                                                                                                                 | abdelilah.charyate@uit.ac.ma |
| Aaron L. Wichman       | Western Kentucky University, Psychological Sciences Department, Bowling Green, United States                                                                                                                      | aaron.wichman@wku.edu        |
| Alina Stoyanova        | Sofia University St. Kliment Ohridski, Department of General, Experimental, Developmental, and Health Psychology, Sofia, Bulgaria                                                                                 | a.svilenova@gmail.com        |
| Anna Greenburgh        | University College London, Department of Experimental                                                                                                                                                             | a.greenburgh@ucl.ac.uk       |

|                         |                                                                                                                                                                       |                               |
|-------------------------|-----------------------------------------------------------------------------------------------------------------------------------------------------------------------|-------------------------------|
|                         | Psychology, London, United Kingdom                                                                                                                                    |                               |
| Andrew G. Thomas        | Swansea University, Psychology Department, Swansea, United Kingdom                                                                                                    | research@agthomas.net         |
| Alexios Arvanitis       | University of Crete, Department of Psychology, Crete, Greece                                                                                                          | a.arvanitis@uoc.gr            |
| Patrick S Forscher      | Université Grenoble Alpes, LIP/PC2S, Grenoble, France<br>Busara Center for Behavioral Economics, Nairobi, Kenya                                                       | schnarrd@gmail.com            |
| Peter R Mallik          | Ashland University, Department of Psychology, Ashland, United States                                                                                                  | pmallik@ashland.edu           |
| Nicholas A. Coles       | Harvard University, Harvard Kennedy School, Boston, United States<br>Stanford University, Center for the Study of Language and Information, California, United States | ncoles797@gmail.com           |
| Jeremy K. Miller        | Willamette University, Department of Psychology, Salem, United States                                                                                                 | millerj@willamette.edu        |
| Hannah Moshontz         | University of Wisconsin-Madison, Department of Psychology, Madison, United States                                                                                     | hmoshontz@gmail.com           |
| Heather L. Urry         | Tufts University, Department of Psychology, Medford, United States                                                                                                    | heather.urry@tufts.edu        |
| Hans IJzerman           | Université Grenoble Alpes, Grenoble, France<br>Institut Universitaire de France, Paris, France                                                                        | h.ijzerman@gmail.com          |
| Dana M. Basnight-Brown  | United States International University Africa, Nairobi, Kenya                                                                                                         | dana.basnightbrown@usiu.ac.ke |
| Charles R. Ebersole     | University of Virginia, Department of Psychology, Charlottesville, United States                                                                                      | ceberson@virginia.edu         |
| Christopher R. Chartier | Ashland University, Department of Psychology, Ashland, United States                                                                                                  | cchartie@ashland.edu          |
| Erin M. Buchanan        | Harrisburg University of Science and Technology, Harrisburg, United States                                                                                            | ebuchanan@harrisburgu.edu     |
| Maximilian A. Primbs    | Radboud University, Behavioural Science Institute, Nijmegen, Netherlands                                                                                              | maximilian.primbs@gmx.de      |

---

*Note.* Authors are presented in 3 tiers, with the first tier of five authors being the lead team, the last team being the lead admin team, and the middle tier being everyone who contributed to data collection,



translation, methodology, and administrative tasks. Within the first tier, authorship order corresponds to contribution. Within the second and third tiers, authorship order is arbitrary (i.e., by alphabetical order of email address) with the exception of the last author, which was determined by a vote among the admin team.

## Contribution Statement

Conceptualization: T. Nguyen, N. Legate, N. Weinstein, A.C. Moller, L. Legault

Data Curation: P.S. Forscher, E.M. Buchanan

Formal Analysis: T. Nguyen, C.R. Ebersole

Funding Acquisition: P.S. Forscher, H. Ijzerman, C. Chartier, E.M. Buchanan

Investigation: Z. Vally, Z. Tajchman, A.N. Zsido, Z. Chen, I. Ziano, C.D. Ceary, Y. Lin, Y. Kunisato, Q. Xiao, X. Jiang, E. Yao, W.S. Ryan, J. Wilson, W. Jimenez-leal, W. Law, W. Collins, K.L. Richard, W. Unanue, M. Vranka, V. Lerche, V. Ankushev, V. Barkoukis, V. Schei, C. Depaola, U.S. Tran, S. Yeung, W. Hassan, T.J. Lima, T. Ostermann, T. Frizzo, T.E. Sverdrup, T. House, T. Gill, T. Jernsäter, T. Machin, M. Koptjevskaja-tamm, T.J. Hostler, T. Ishii, A. Studzinska, S.M. Janssen, S.E. Schulenberg, S. Tatachari, S. Azouaghe, P. Sorokowski, A. Sorokowska, X. Song, S. Morbée, D. Grigoryev, S. Daches, S.L. Levine, S.N. Geniole, S. Vračar, S. Massoni, S. Zorjan, E. Sarioguz, S.G. Alves, S. Pöntinen, S. Álvarez Solas, S. Ordoñez-Riaño, S. Batić Očovaj, S. Onie, S. Lins, S. Çoksan, A. Sacakli, S. Ruiz-Fernández, S. Fatahmodares, R.B. Walczak, R. Vilar, R. Doekemeijer, R.A. Cárcamo, R.M. Ross, R. Mccarthy, T. Ballantyne, E.C. Westgate, R. Gargurevich, R. Afhami, D. Ren, R.P. Monteiro, U. Reips, N. Reggev, R.J. Calin-jageman, R. London, R. Oliveira, M. Nedelcheva-Datsova, R. Rahal, T. Radtke, R. Searston, P. Zdybek, S. Chen, P. Wajanatinapart, J.T. Perillo, P. Kačmár, P. Macapagal, P. Szwed, P. Hanel, P.A. Forbes, P. Arriaga, N. Parashar, K. Papachristopoulos, P.S. Correa, C. Ogbonnaya, O. Bialobrzaska, N. Kiselnikova, N. Simonovic, N. Nock, C. Thogersen-Ntoumani, N. Ntoumanis, A. Hernandez, N. Albayrak-Aydemir, N. Say, A.B. Neubauer, N.I. Martin, N. Levy, N. Torunsky, N. Van Antwerpen, N. Van Doren, N. Sunami, N.R. Rachev, N.M. Majeed, N.S. Corral-Frías, N. Ouherrou, M.Y. Lucas, M. Pantazi, M.R. Vasilev, M. V. Ortiz, M.M. Butt, R. Muda, M.C. Tejada Rivera, M. Sirota, M. Seehuus, E. Smit, M. Parzuchowski, M. Toro, M. Hricova, M. Marszalek, M. Metz, M. Karekla, G. Mioni, L. Matos, M. Westerlund, M. Vdovic, M. Bialek, M. Anne, M. Misiak, M. Grinberg, M.F. Espinoza Barría, M.C. Mensink, M. Harutyunyan, M. Khosla, M. Adamkovič, M.F. Ribeiro, M. Terskova, M. Hruška, M. Martončík, M. Voracek, M. Frias-Armenta, M. Kowal, M. Roczniowska, P. Rentzelas, M. Braun Kohlová, M. Paruzel-Czachura, M. Romanova, M. Papadatou-Pastou, M. Magrin, M.V. Jones, M. Li, M.S. Ortiz, M. Manavalan, M. Kossowska, M.L.M. van Hooff, M.A. Varella, M. Standage, M. Nicolotti, M.F. Colloff, M. Bradford, L. Vaughn, L. A. Eudave, L. Vieira, L. Calderón Pérez, L.B. Lazarevic, L.M. Jaremka, E. Kushnir, G. Lins De Holanda Coelho, L. Ahlgren, F. Liga, L. Gunton, L. Volz, L. Boucher, L. Javela Delgado, L. Beatrix, K. Yu, J. Wachowicz, K. Desai, K. Barzykowski, M. Bayyat, L. Kozma, K. Evans, M.A. Koehn, K. Wolfe, K. Morris, K. Klevjer, K. Vezirian, K. Damjanović, K. Schmidt, K. Moon, J. Kiełińska, J.E. Cruz Vásquez, J. Chanal, J. Vargas-nieto, J.T. Roxas, J. Taber, J. Urriago-Rayo, J.M. Pavlacic, J. Benka, J. Bavolar, J.A. Soto, J.K. Olofsson, J.K. Vilsmeier, J. Czamanski-cohen, J.D. Moss, J. Boudesseul, J. Kamburidis, J.A. Joy-Gaba, J. Zickfeld, J.F. Miranda, E. Hristova, J. Milosevic Djordjevic, J.V. Valentova, J. Antfolk, J. Berkessel, J. Schrötter, J. Urban, J. Röer, J.O. Norton, J.R. Silva, J. Uttley, J.R. Kunst, I.L. Ndukaihe, A. Iyer, I. Vilares, A. Ivanov, I. Ropovik, I. Sarieva, I. Prusova, I. Pinto, I.A. Almeida, I. Dalgat, I. Zakharov, A. Arinze, K. Ihaya, I.D. Stephen, B. Gjoneska, H. Brohmer, H. Flowe, H. Godbersen, H. Kocalar, M.V. Hedgebeth, H. Manley, G. Kaminski, G. Nilsonne, G. Anjum, G.A. Travaglino, G. Feldman, G. Pfuhl, G. Marcu, G. Hofer, G. Banik, G. Bijlstra, F. Verbruggen, F.Y.H. Kung, F. Martela, F. Foroni, J. Forest, G. Singer, F. Mosannenzadeh, E. Marinova, E. Štrukelj, E. Baskin, E. Luis Garcia, E. Musser, E. Ahn, E. Pronizius, E.A. Jackson, E. Manunta, E. Agadullina, D. Šakan, O. Dujols, D. Dubrov, M. Willis, M. Tümer, I. Djamai, D. Herrera, D. Vega, H. Du, D. Mola, D. Chakarova, W.E. Davis, D. Holford, D. Lewis, D.C. Vaidis, D. Hausman Ozery, D. Zambrano Ricaurte, D. Storage, D. Sousa, D. Serrato Alvarez, D. Boller, A. Dalla Rosa, D. Marko, D. Moreau, C. Reeck, R.C. Correia, C.M. Whitt, C. Lamm, C. Singh Solorzano, C.C. von Bastian, C.A. Sutherland, C.L. Aberson, C.P. Niemiec, B. Soenens, M. Vansteenkiste, C. Reimer, C. Karashiali, C. Noone, F. Chiu, C. Eben, C. Brownlow, C. Karaarslan, N. Cellini, C. Esteban-serna, C. Reyna, C. Batres, C. Grano, J. Carpentier, C.H. Fu, B. Jaeger, C. Bundt, T. Bulut Allred, A. Bokkour, N. Bogatyreva, W.J. Chopik, B. Antazo, B. Behzadnia, M. Becker, W. Chou, H. Bai, B. Balci, P. Babinčák, B.J. Dixson, A. Mokady, H.B. Kappes, M. Atari, J. Aruta, A. Domurat, N. Arinze, A. Vatakis, A. Adiguzel, K. Ait El Arabi, A.A. Özdoğru, A. Olaya Torres, A. Theodoropoulou, A.P. Kassianos, A. Findor, A. Hartanto, A. Thibault Landry, A. Ferreira, A.C. Santos, A. De La Rosa-Gomez, A. Gourdon-Kanhukamwe, A. Karababa, A. Janak, A. Bran,

A.M. Tullett, A.O. Kuzminska, A.J. Krafnick, A. Urooj, A. Khaoudi, A. Ahmed, A. Groyecka-bernard, A. Askelund, A. Adetula, A. Belaus, A.C. Charyate, A.L. Wichman, A. Stoyanova, A. Greenburgh, A. Thomas, A. Arvanitis, P.S. Forscher, J.K. Miller, H. Urry, H. Ijzerman, E.M. Buchanan, M.A. Primbs

Methodology: C.R. Ebersole, A.C. Moller, M. Maniaci, R.M. Ryan, P. Arriaga, M.A. Silan, M.C. Mensink, J.S. Pickering, I. Ropovik, F. Azevedo, A. Thomas, H. Urry, D.M. Basnight-brown

Project Administration: C.R. Ebersole, Y. Jang, Y. Yamada, M. Vranka, V. Kovic, V. Križanić, T. Machin, S. Lewis, S. Meir Drexler, S. Morales Izquierdo, S. Tshonda, T. Biberauer, N. Reggev, R. Habte, P. Hanel, P. Arriaga, B. Paris, M.R. Vasilev, M. Alarcón Maldonado, M.A. Silan, M. Martončík, M. Oosterlinck, C.A. Levitan, L. Volz, L. Kozma, K. Barzykowski, K. Kirgizova, K. Thommesen, J.W. Suchow, J.E. Beshears, J. Antfolk, I. Sula, I.L. Pit, I. Dalgar, M. R. Dunn, A. Luxon, B. Gjoneska, H. Chuan-peng, M. Sharifian, H. Azab, G. Kaminski, G. Marcu, F. Azevedo, E. Štrukelj, E. Pronizius, J.L. Beaudry, D. Dunleavy, F. Chiu, N. Cellini, B. Ishkhanyan, L. Bylinina, T. Bulut Allred, M. Becker, A. Szabelska, A. Singh, A.P. Kassianos, A. Gourdon-Kanhukamwe, A. Todsén, A. Urooj, A. Ahmed, A. Askelund, A. Adetula, P.S. Forscher, P.R. Mallik, N.A. Coles, J.K. Miller, H. Moshontz, H. Urry, H. Ijzerman, D.M. Basnight-brown, C. Chartier, E.M. Buchanan, M.A. Primbs, E.L. Bradshaw

Resources: A.N. Zsido, M. Zrimsek, Z. Chen, Z. Gialitaki, Y. Jang, Y. Kunisato, Y. Yamada, X. Jiang, X. Du, E. Yao, W. Cyrus-lai, W. Law, M. Vranka, V. Schei, V. Križanić, V.H. Kadreva, V. Cubela Adoric, R. Houston, T.E. Sverdrup, M. Fedotov, T. Jernsäther, T. Rahman, M. Koptjevskaja-Tamm, T. Ishii, B. Szaszi, S. Adamus, L. Suter, S. Habib, A. Studzinska, D. Stojanovska, S. Stieger, S. Azouaghe, S. Lewis, S. Sinkolova, S. Meir Drexler, S. Akter, S. Massoni, E. Sarioğuz, S. Morales Izquierdo, S.G. Alves, S. Pöntinen, S. Çoksan, A. Sacakli, S. Ruiz-Fernández, S.J. Geiger, R. Betlehem, R. Vilar, R.P. Monteiro, U. Reips, N. Reggev, R. Pourafshari, R. Oliveira, M. Nedelcheva-datsova, R.R. Ribeiro, R. Habte, S. Chen, P.G. Maturan, P. Kačmár, P. Hanel, P. Arriaga, B. Paris, O. Kácha, M. Bernardo, O. Campos, O. Niño Bravo, O.J. Galindo-Caballero, O. Bialobrzeska, N. Cohen, N. Johannes, N. Say, N. Sunami, N.R. Rachev, N. Schmidt, K. Nadif, N. Abbas, M. Pantazi, M.R. Vasilev, M. Kurfali, M. Kabir, M. Parzuchowski, M. Alarcón Maldonado, M. Marszalek, G. Mioni, M.J. Bosma, M. Westerlund, M. Vdovic, M. Bialek, M.A. Silan, M. Capizzi, M. A. Kurfali, M. Harutyunyan, M. Korbmacher, M. Adamkovič, M. Hruška, M. Jansen, M. Čadek, M. Kowal, M. Topor, T. Paltrow, M. Roczniewska, M. Oosterlinck, M. Paruzel-czachura, M. Sabristov, M. Lund, M. Antoniadi, A. Muminov, M. Kossowska, M. Friedemann, M. Wielgus, L. Vieira, L. Sanabria Pineda, E. Kushnir, L. Anton-boicuk, G. Lins De Holanda Coelho, L. Ahlgren, C.A. Levitan, L. Micheli, L. Volz, M. Stojanovska, L. Samojlenko, L. Kaliska, L. Beatrix, L. Warmelink, L. Rojas-Berscia, J. Wachowicz, K. Barzykowski, L. Kozma, K. Kirgizova, B.B. Agesin, T. Korobova, K. Klevjer, K. Van Schie, K. Vezirian, K. Thommesen, K. Filip, K. Staniaszek, K. Grzech, K. Hoyer, K. Rana, K. Janjić, J. Kiełńska, J. Beitner, J. Vargas-Nieto, J. Bavolar, J. Messerschmidt, J. Czamanski-cohen, J. Lee, J. Kamburidis, J. Zickfeld, J.P. Verharen, E. Hristova, J.E. Beshears, J. Milosevic Djordjevic, J. Bosch, J. Antfolk, J. Berkessel, J. Schrötter, J. VINTR, J.R. Kunst, I. Ropovik, I. Sula, I. Metin-orta, A. Bozdoc, I.L. Pit, I. Dalgar, I. Zakharov, K. Ihaya, B. Gjoneska, H. Kocalar, H. Chuan-peng, M. Sharifian, H. Akkas, H. Azab, G. Kaminski, G. Nilsonne, G. Czarnek, G. Marcu, G. Banik, G.A. Adetula, F. Muchembled, F. Azevedo, F. Mosannenzadeh, E. Marinova, E. Štrukelj, Z. Etebari, I. Van Steenkiste, E. Pronizius, E. Manunta, D. Šakan, P. Dursun, O. Dujols, D. Dubrov, M. Tümer, J.L. Beaudry, D. Popović, D. Dunleavy, I. Djamai, D. Krupić, D. Vega, D. Zambrano Ricaurte, D. Serrato Alvarez, A. Dalla Rosa, D. Dimova, D. Krupić, D. Marko, R.C. Correia, C. Singh Solorzano, C.C. von Bastian, C. Overkott, C. Wang, F. Chiu, C. Picciocchi, C. Karaarslan, N. Cellini, R. Li, C. Grano, C. Tamnes, B. Ishkhanyan, T. Bulut Allred, A. Bokkour, N. Bogatyreva, J. Shi, B. Antazo, M. Becker, B. Cocco, B. Hubena, B. Žuro, B. Aczel, E. Baklanova, A. Mokady, A. Szala, A. Szabelska, J. Aruta, A. Domurat, A. Modena, A. Adiguzel, A. Monajem, K. Ait El Arabi, A.A. Özdoğru, A. Skowronek, A. Penić Jurković, A.P. Kassianos, A. Findor, A. Thibault Landry, A.C. Santos, A. Gourdon-Kanhukamwe, A. Todsén, A. Karababa, A. Pilato, A. Bran, A. Khaoudi, A. Ahmed, A. Groyecka-Bernard, A. Askelund, A. Adetula, A. Stoyanova, E.M. Buchanan

Supervision: C.R. Ebersole, K. Thommesen, J.W. Suchow, M. Sharifian, A. Todsén, P.S. Forscher, P.R. Mallik, N.A. Coles, J.K. Miller, H. Moshontz, H. Urry, H. Ijzerman, D.M. Basnight-brown, C. Chartier, E.M. Buchanan, M.A. Primbs

Writing - Original Draft: T. Nguyen, N. Legate, N. Weinstein, A.C. Moller, L. Legault

Writing - Review and Editing: C.R. Ebersole, A.C. Moller, Z. Vally, Z. Tajchman, A.N. Zsido, M. Zrimsek, Z. Chen, I. Ziano, Z. Gialitaki, C.D. Ceary, Y. Jang, Y. Lin, Y. Kunisato, Y. Yamada, Q. Xiao, X. Jiang, X. Du, E. Yao, W.S. Ryan, J. Wilson, W. Cyrus-Lai, W. Jimenez-Leal, W. Law, W. Collins, K.L. Richard, W. Unanue, M. Vranka, V. Ankushev, V. Barkoukis, V. Schei, C. Depaola, V. Lerche, V. Kovic, V. Križanić, V.H. Kadreva, V. Cubela Adoric, U.S. Tran, S. Yeung, W. Hassan, R. Houston, T.J. Lima, T. Ostermann, T. Frizzo, T.E. Sverdrup, T. House, T. Gill, M. Fedotov, T. Jernsäther, T. Rahman, T. Machin, M. Koptjevskaja-Tamm, T.J. Hostler, T. Ishii, B. Szaszi, S. Adamus, L. Suter, S. Habib, A. Studzinska, D. Stojanovska, S.M. Janssen, S. Stieger, S.E. Schulenberg, S. Tatachari, S. Azouaghe, M. Vansteenkiste, P. Sorokowski, A. Sorokowska, X. Song, S. Morbée, S. Lewis, S. Sinkolova, D. Grigoryev, S. Meir Drexler, S. Daches, S.L. Levine, S.N. Geniole, S. Akter, S. Vračar, S. Massoni, S. Zorjan, E. Sarioğuz, S. Morales Izquierdo, S. Tshonda, S.G. Alves, S. Pöntinen, S. Álvarez Solas, S. Ordoñez-Riaño, S. Batić Očovaj, S. Onie, S. Lins, T. Biberauer, S. Çoksan, A. Sacakli, S. Ruiz-Fernández, S.J. Geiger, S. Fatahmodares, R.B. Walczak, R. Betlehem, R. Vilar, R. Doekemeijer, R.A. Cárcamo, R.M. Ross, R. Mccarthy, T. Ballantyne, E.C. Westgate, R. Gargurevich, R.M. Ryan, P. Rentzelas, B. Soenens, R. Afhami, D. Ren, R.P. Monteiro, U. Reips, N. Reggev, E. Smit, L. Matos, R.J. Calin-jageman, R. Pourafshari, R. London, R. Oliveira, M. Nedelcheva-Datsova, R. Rahal, R.R. Ribeiro, T. Radtke, R. Searston, R. Habte, P. Zdybek, S. Chen, P. Wajanatinapart, P.G. Maturan, J.T. Perillo, P.M. Isager, P. Kačmár, P. Macapagal, M. Maniaci, P. Szwed, P. Hanel, P.A. Forbes, P. Arriaga, B. Paris, T. Paltrow, N. Parashar, K. Papachristopoulos, P.S. Correa, O. Kácha, M. Bernardo, O. Campos, O. Niño Bravo, O.J. Galindo-caballero, C. Ogbonnaya, O. Bialobrzeska, N. Kiselnikova, N. Simonovic, N. Cohen, N. Nock, A. Hernandez, C. Thogersen-Ntoumani, N. Ntoumanis, N. Johannes, N. Albayrak-Aydemir, N. Say, A.B. Neubauer, N.I. Martin, N. Levy, N. Torunsky, N. Van Antwerpen, N. Van Doren, N. Sunami, N.R. Rachev, N.M. Majeed, N. Schmidt, K. Nadif, N.S. Corral-Frías, N. Ouherrou, N. Abbas, M. Pantazi, M.Y. Lucas, M.R. Vasilev, M.V. Ortiz, M.M. Butt, M. Bayyat, M. Kurfali, M. Kabir, R. Muda, M.C. Tejada Rivera, M. Sirota, M. Seehuus, M. Parzuchowski, M. Toro, M. Hricova, M. Alarcón Maldonado, M. Metz, M. Marszalek, M. Karekla, G. Mioni, M.J. Bosma, M. Westerlund, M. Vdovic, M. Bialek, M.A. Silan, M. Anne, M. Misiak, M. Grinberg, M. Capizzi, M.F. Espinoza Barría, M. A. Kurfali, M.C. Mensink, M. Harutyunyan, M. Khosla, M. Korbmacher, M. Adamkovič, M.F. Ribeiro, M. Terskova, M. Hruška, M. Martončík, M. Jansen, M. Voracek, M. Čadek, M. Frias-Armenta, M. Kowal, M. Topor, M. Roczniowska, M. Oosterlinck, M. Braun Kohlová, M. Paruzel-Czachura, M. Sabristov, M. Romanova, M. Papadatou-Pastou, M. Lund, M. Antoniadis, M. Magrin, M.V. Jones, M. Li, M.S. Ortiz, M. Manavalan, A. Muminov, M. Kossowska, M. Friedemann, M. Wielgus, M.L.M. van Hooff, M.A. Varella, M. Standage, M. Nicolotti, M.F. Colloff, M. Bradford, L. Vaughn, L. A.Eudave, L. Vieira, L. Sanabria Pineda, L. Calderón Pérez, L.B. Lazarevic, L.M. Jaremka, E. Kushnir, L. Anton-boicuk, G. Lins De Holanda Coelho, L. Ahlgren, F. Liga, C.A. Levitan, L. Micheli, L., L. Gunton, Volz, M. Stojanovska, L. Boucher, L. Samojlenko, L. Javela Delgado, L. Kaliska, L. Beatrix, L. Warmelink, L. Rojas-berscia, K. Yu, J. Wachowicz, K. Desai, K. Barzykowski, L. Kozma, K. Evans, K. Kirgizova, B.B. Agesin, M.A. Koehn, K. Wolfe, T. Korobova, K. Morris, K. Klevjer, K. Van Schie, K. Vezirian, K. Damjanović, K. Thommesen, K. Schmidt, K. Filip, K. Staniaszek, K. Grzech, K. Hoyer, K. Moon, K. Rana, K. Janjić, J.W. Suchow, J. Kiełńska, J.E. Cruz Vásquez, J. Chanal, J. Beitner, J. Vargas-Nieto, J.T. Roxas, J. Taber, J. Urriago-Rayó, J.M. Pavlacic, J. Benka, J. Bavolar, J.A. Soto, J.K. Olofsson, J.K. Vilsmeier, J. Messerschmidt, J. Czamanski-cohen, J.D. Moss, J. Boudesseul, J. Lee, J. Kamburidis, J.A. Joy-Gaba, J. Zickfeld, J.F. Miranda, J.P. Verharen, E. Hristova, J.E. Beshears, J. Milosevic Djordjevic, J. Bosch, J.V. Valentova, J. Antfolk, J. Berkessel, J. Schrötter, J. Urban, J. Röer, J.O. Norton, J.R. Silva, J.S. Pickering, J. Vint, J. Uttley, J.R. Kunst, I.L. Ndukaihe, A. Iyer, I. Vilares, A. Ivanov, I. Ropovik, I. Sula, I. Sarieva, I. Metin-orta, I. Prusova, I. Pinto, A. Bozdoc, I.A. Almeida, I.L. Pit, I. Dalgat, I. Zakharov, A. Arinze, K. Ihaya, I.D. Stephen, B. Gjoneska, H. Brohmer, H. Flowe, H. Godbersen, H. Kocalar, M.V. Hedgebeth, H. Chuan-peng, M. Sharifian, H. Manley, H. Akkas, H. Azab, G. Kaminski, G. Nilsonne, G. Anjum, G.A. Travaglino, G. Feldman, G. Pfuhl, G. Czarnek, G. Marcu, G. Hofer, G. Banik, G.A. Adetula, G. Bijlstra, F. Verbruggen, F.Y.H. Kung, F. Martela, F. Foroni, J. Forest, G. Singer, F. Muchembled, F. Azevedo, F. Mosannenzadeh, E. Marinova, E. Štrukelj, Z. Etebari, E. Baskin, E. Luis Garcia, E. Musser, I. Van Steenkiste, E. Ahn, E. Pronizius, E.A. Jackson, E. Manunta, E. Agadullina, D. Šakan, P. Dursun, O. Dujols, D. Dubrov, M. R. Dunn, M. Willis, M. Tümer, J.L. Beaudry, D. Popović, D. Dunleavy, I. Djamai, D. Krupić, D. Herrera, D. Vega, H. Du, D. Mola, D. Chakarova, W.E. Davis, D. Holford, D. Lewis, D.C. Vaidis, D. Hausman Ozery, D. Zambrano Ricaurte, D. Storage, D. Sousa, D. Serrato Alvarez, D. Boller, A. Dalla Rosa, D. Dimova, D. Krupić, D. Marko, D. Moreau, C. Reeck, R.C. Correia, C.M. Whitt, C. Lamm, A. Luxon C. Singh Solorzano, C.C. von Bastian, C.A. Sutherland, C. Overkott, C.L. Aberson, C. Wang, C.P. Niemiec, C.

Reimer, C. Karashiali, C. Noone, F. Chiu, C. Picciocchi, C. Eben, C. Brownlow, C. Karaarslan, N. Cellini, C. Esteban-serna, C. Reyna, C. Batres, R. Li, C. Grano, J. Carpentier, C. Tamnes, C.H. Fu, B. Ishkhanyan, L. Bylinina, B. Jaeger, C. Bundt, T. Bulut Allred, A. Bokkour, N. Bogatyreva, J. Shi, W.J. Chopik, B. Antazo, B. Behzadnia, M. Becker, B. Cocco, W. Chou, B. Hubena, B. Žuro, B. Aczel, E. Baklanova, H. Bai, B. Balci, P. Babinčák, B.J. Dixon, A. Mokady, H.B. Kappes, M. Atari, A. Szala, A. Szabelska, J. Aruta, A. Domurat, N. Arinze, A. Modena, A. Vatakis, A. Adiguzel, A. Monajem, K. Ait El Arabi, A.A. Özdoğru, A. Olaya Torres, A. Theodoropoulou, A. Skowronek, A. Penić Jurković, A. Singh, A.P. Kassianos, A. Findor, A. Hartanto, A. Thibault Landry, A. Ferreira, A.C. Santos, A. De La Rosa-gomez, A. Gourdon-Kanhukamwe, A. Todsén, A. Karababa, A. Janak, A. Pilato, A. Bran, A.M. Tullett, A.O. Kuzminska, A.J. Krafnick, A. Urooj, A. Khaoudi, A. Ahmed, A. Groyecka-Bernard, A. Askelund, A. Adetula, A. Belaus, A.C. Charyate, A.L. Wichman, A. Stoyanova, A. Greenburgh, A. Thomas, A. Arvanitis, P.S. Forscher, P.R. Mallik, N.A. Coles, J.K. Miller, H. Moshontz, H. Urry, H. Ijzerman, D.M. Basnight-brown, C. Chartier, E.M. Buchanan, M.A. Primbs, E.L. Bradshaw

Contributions listed here reflect documented contributions to the project. People who helped with translation are listed as Resources contributors; people who helped with data collection are listed as Investigation contributors.

There were additional contributors to this project who declined to be included as authors or did not reply to requests to provide information and approval. These people served in various roles, including Resources, Project Administration, Methodology, and Investigation.
